1 **In vivo transomic analyses of glucose-responsive metabolism in skeletal**  
2 **muscle reveal core differences between the healthy and obese**  
3 **states**  
4

5 **Authors:** Toshiya Kokaji<sup>1,2†</sup>, Miki Eto<sup>1†</sup>, Atsushi Hatano<sup>1,3,4</sup>, Katsuyuki Yugi<sup>1,3,5,6</sup>,  
6 Keigo Morita<sup>1</sup>, Satoshi Ohno<sup>1,7</sup>, Masashi Fujii<sup>1,7,8</sup>, Ken-ichi Hironaka<sup>1</sup>, Yuki Ito<sup>9,10</sup>,  
7 Riku Egami<sup>9</sup>, Saori Uematsu<sup>9</sup>, Akira Terakawa<sup>1</sup>, Yifei Pan<sup>9</sup>, Hideki Maehara<sup>1</sup>, Dongzi  
8 Li<sup>1</sup>, Yunfan Bai<sup>9</sup>, Takaho Tsuchiya<sup>11,12</sup>, Haruka Ozaki<sup>11,12</sup>, Hiroshi Inoue<sup>13</sup>, Hiroyuki  
9 Kubota<sup>10</sup>, Yutaka Suzuki<sup>9</sup>, Akiyoshi Hirayama<sup>14</sup>, Tomoyoshi Soga<sup>14</sup>, and Shinya  
10 Kuroda<sup>1,9,15\*</sup>

11 **Affiliations:**

12 <sup>1</sup>Department of Biological Sciences, Graduate School of Science, University of Tokyo,  
13 7-3-1 Hongo, Bunkyo-ku, Tokyo 113-0033, Japan

14 <sup>2</sup>Data Science Center, Nara Institute of Science and Technology, 8916-5 Takayama,  
15 Ikoma, Nara, Japan

16 <sup>3</sup>Laboratory for Integrated Cellular Systems, RIKEN Center for Integrative Medical  
17 Science, 1-7-22 Suehiro-cho, Tsurumi-ku, Yokohama, Kanagawa 230-0045, Japan

18 <sup>4</sup>Department of Omics and Systems Biology, Niigata University Graduate School of  
19 Medical and Dental Sciences, 757 Ichibancho, Asahimachi-dori, Chuo Ward, Niigata  
20 City 951-8510, Japan

21 <sup>5</sup>Institute for Advanced Biosciences, Keio University, Fujisawa, 252-8520, Japan

22 <sup>6</sup>PRESTO, Japan Science and Technology Agency, 1-7-22 Suehiro-cho, Tsurumi-ku,  
23 Yokohama, Kanagawa 230-0045, Japan

24 <sup>7</sup>Molecular Genetics Research Laboratory, Graduate School of Science, University of  
25 Tokyo, 7-3-1 Hongo, Bunkyo-ku, Tokyo 113-0033, Japan

26 <sup>8</sup>Department of Mathematical and Life Sciences, Graduate School of Integrated  
27 Sciences for Life, Hiroshima University 1-3-1 Kagamiyama, Higashi-hiroshima city,  
28 Hiroshima, 739-8526, Japan

29 <sup>9</sup>Department of Computational Biology and Medical Sciences, Graduate School of  
30 Frontier Sciences, University of Tokyo, 5-1-5 Kashiwanoha, Kashiwa, Chiba 277-8562,  
31 Japan

32 <sup>10</sup>Division of Integrated Omics, Research Center for Transomics Medicine, Medical  
33 Institute of Bioregulation, Kyushu University, 3-1-1 Maidashi, Higashi-ku, Fukuoka  
34 812-8582, Japan

35 <sup>11</sup>Bioinformatics Laboratory, Faculty of Medicine, University of Tsukuba, Ibaraki, 305-  
36 8575, Japan

37 <sup>12</sup>Center for Artificial Intelligence Research, University of Tsukuba, Ibaraki, 305-8577,  
38 Japan

39 <sup>13</sup>Metabolism and Nutrition Research Unit, Institute for Frontier Science Initiative,  
40 Kanazawa University, 13-1 Takaramachi, Kanazawa, Ishikawa, 920-8641, Japan

41 <sup>14</sup>Institute for Advanced Biosciences, Keio University, 246-2 Mizukami, Kakuganji,  
42 Tsuruoka, Yamagata 997-0052, Japan

43 <sup>15</sup>Core Research for Evolutional Science and Technology (CREST), Japan Science and  
44 Technology Agency, Bunkyo-ku, Tokyo 113-0033, Japan

45 \*Correspondence to: skuroda@bs.s.u-tokyo.ac.jp

46 †These authors contributed equally

47

48 **Abstract**

49 Metabolic regulation in skeletal muscle is essential for blood glucose homeostasis.  
50 Obesity causes insulin resistance in skeletal muscle, leading to hyperglycemia and type 2  
51 diabetes. In this study, we performed multiomic analysis of the skeletal muscle of wild-  
52 type (WT) and genetically obese (*ob/ob*) mice, and constructed regulatory transomic  
53 networks for metabolism after oral glucose administration. Our network revealed that  
54 metabolic regulation by glucose-responsive metabolites had a major effect on WT mice,  
55 especially carbohydrate metabolic pathways. By contrast, in *ob/ob* mice, much of the  
56 metabolic regulation by glucose-responsive metabolites was lost and metabolic regulation  
57 by glucose-responsive genes was largely increased, especially in carbohydrate and lipid  
58 metabolic pathways. We present some characteristic metabolic regulatory pathways  
59 found in central carbon, branched amino acids, and ketone body metabolism. Our  
60 transomic analysis will provide insights into how skeletal muscle responds to changes in  
61 blood glucose and how it fails to respond in obesity.

62

63 **Main text:**

64 **Introduction**

65 Blood glucose level is regulated by the cooperative function of many tissues. Insulin,  
66 the hormone for lowering blood glucose level, is secreted by pancreatic beta cells when  
67 blood glucose level rises. Insulin lowers blood glucose level by stimulating glucose  
68 disposal in the skeletal muscle and adipose tissue, and inhibits gluconeogenesis in the  
69 liver (Evans et al., 2004). Type 2 diabetes mellitus (T2DM) is one of the most  
70 devastating results of obesity, and is characterized by insulin resistance and  
71 hyperglycemia (Kahn et al., 2006). Reduced responsiveness of skeletal muscle to insulin

72 is one of the critical aspects of T2DM development (DeFronzo and Tripathy, 2009).  
73 T2DM is a multifactorial disease involving many complex signaling pathways in  
74 different tissues; thus, a comprehensive analysis might help further our understanding of  
75 the molecular mechanisms of this disease.

76 Metabolism is a series of chemical reactions that convert starting materials into  
77 molecules that maintain the living state of cells and organisms. Metabolic reactions,  
78 defined as chemical reactions of metabolism, are regulated by metabolic enzymes and  
79 metabolites. Metabolic enzymes mainly regulate metabolic reactions at the gene  
80 expression level, which is determined by transcription factors; and at the enzyme  
81 activity level, which is regulated by post-translational modifications such as  
82 phosphorylation. Metabolites regulate metabolic reactions through the concentration of  
83 substrates, and also through the allosteric regulation of enzyme activity.

84 Integrating multiple omics techniques such as metabolomics, proteomics, and  
85 transcriptomics is useful for understanding the flow of biological information, and has  
86 been applied to a wide range of biological problems (Hasin et al., 2017; Wiley, 2011).  
87 Several groups have used multiomic approaches to study the molecular mechanisms of  
88 insulin resistance. One study integrated epigenomics, transcriptomics, proteomics, and  
89 metabolomics to analyze the liver of mice fed a high-fat diet (Soltis et al., 2017).  
90 Another study used transcriptomics, proteomics, metabolomics, and microbiomics to  
91 analyze blood and stool samples from healthy human participants during weight gain  
92 and weight loss (Piening et al., 2018). A transomic approach, proposed by our group,  
93 connects measurements of multiple omics layers such as proteomics, transcriptomics,  
94 and metabolomics based on direct molecular interactions (Kawata et al., 2018; Yugi and  
95 Kuroda, 2018; Yugi et al., 2014, 2016). This approach provides an understanding of the

96 spatiotemporal dynamics of the biochemical network.

97           We previously performed a transomic study of glucose-responsive molecules in  
98 the livers of wild-type (WT) and genetically obese mice (*ob/ob* mice) during oral  
99 glucose administration (Kokaji et al., 2020), and an inter-organ transomic study using  
100 the liver and skeletal muscle of WT and *ob/ob* mice in the starved state (Egami et al.,  
101 2021). In this study, we performed transomic analysis, including transcriptomics and  
102 metabolomics, of glucose-responsive molecules in the skeletal muscle of WT and *ob/ob*  
103 mice during oral glucose administration. By analyzing time-series data, we identified  
104 pathways that are activated or inhibited by oral glucose administration, and determined  
105 how they are dysregulated in obesity. Our study provides a better understanding of the  
106 mechanism of glucose metabolism in skeletal muscle and T2DM.

107

## 108 **Results**

### 109 **Overview of the study**

110 Metabolic reactions, which are defined as chemical reactions of metabolism, are  
111 regulated by an integrated network of metabolites as allosteric regulators, substrates,  
112 and products; metabolic enzymes; transcription factors; and signaling molecules. To  
113 elucidate the regulatory network controlling glucose-responsive metabolic reactions in  
114 skeletal muscle, we constructed a regulatory transomic network by integrating  
115 metabolic reactions with metabolites, gene expression of metabolic enzymes, and  
116 transcription factors, using skeletal muscle excised from C57BL/6J WT mice or *ob/ob*  
117 mice at different time points after glucose administration (Fig. S1). The transomic  
118 network of the skeletal muscle was constructed according to our previous study of the  
119 liver (Kokaji et al., 2020).

120           Glucose was administered orally to 16 h-fasted WT and *ob/ob* mice, and the  
121   gastrocnemius muscle and blood were collected at 0, 20, 60, 120, and 240 min after  
122   glucose administration (Fig. 1A). The *ob/ob* mice showed elevated levels of blood  
123   glucose and insulin compared to WT mice throughout the study (Fig. S2A). The blood  
124   and skeletal muscle data in the fasting state were obtained from our previous studies  
125   (Egami et al., 2021; Kokaji et al., 2020). The skeletal muscle data after oral glucose  
126   administration were newly obtained in this study (Fig. S2B).

127           Using the skeletal muscle data during oral glucose administration, we defined  
128   the features of glucose-responsive molecules according to our previous study (Kokaji et  
129   al., 2020). Molecules that showed statistically significant changes (absolute  $\log_2$  fold  
130   change  $\geq 0.585$  [ $2^{0.585} = 1.5$ ] and a false discovery rate [FDR]-adjusted p value [q value]  
131    $\leq 0.1$ ) at any time point compared to the fasting state after glucose administration were  
132   defined as glucose-responsive (Fig. 1B). We also calculated time constants ( $T_{1/2}$ ) to  
133   study the temporal patterns of glucose-responsive molecules (Fig. 1C).  $T_{1/2}$  was defined  
134   as the amount of time needed for the response to reach half of the minimum (decreasing  
135   molecules) or maximum (increasing molecules) amplitude. According to the blood  
136   insulin concentration, which peaked at about 20 min and decreased to basal level at  
137   about 60 min (Fig. S2A), rapid responses were defined as those with  $T_{1/2}$  values less  
138   than 20 min, and slow responses were defined as those with values longer than 60 min.

139           Glucose-responsive molecules were integrated across the omic layers, and the  
140   regulatory transomic network was constructed in WT and *ob/ob* mice (Fig. 1A). The  
141   transomic networks contained layers of insulin signaling molecules (Insulin signal),  
142   transcription factors (TF), gene expression and phosphorylation of metabolic enzymes  
143   (Enzyme), metabolic reactions (Reaction), and metabolites (Metabolite), and the layers

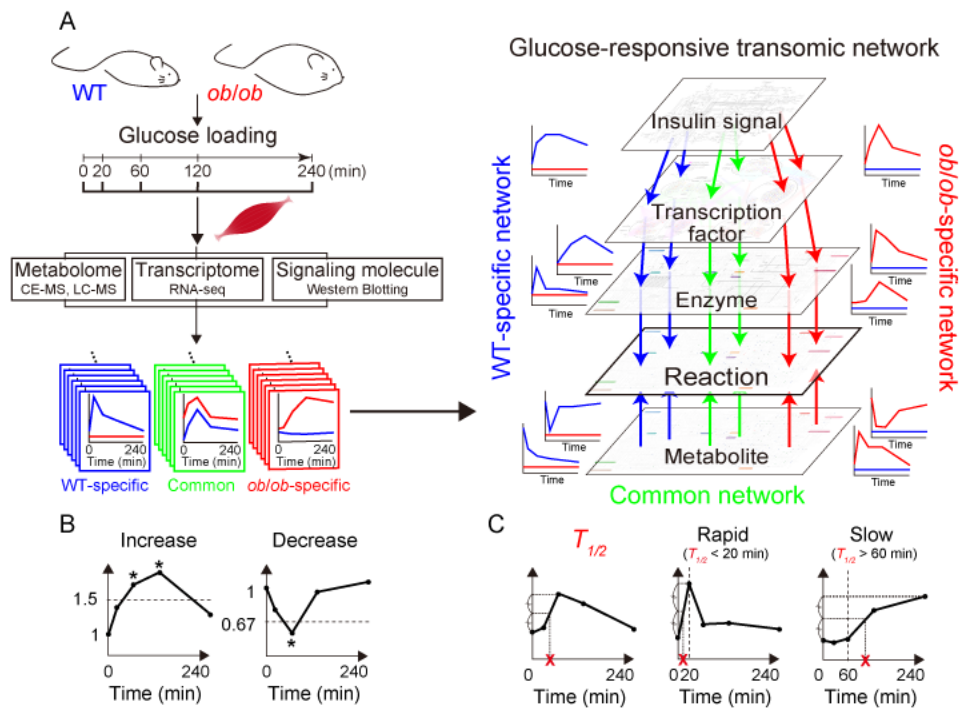

145 **Fig 1. Pipeline of the construction of the glucose-responsive transomic network. (A)**

146 We measured the time courses of multiomic data from the skeletal muscles of WT and

147 *ob/ob* mice following oral glucose administration and identified the molecules that were

148 changed by oral glucose administration, which we defined as glucose-responsive

149 molecules in each layer. We added interlayer regulatory connections between glucose-

150 responsive molecules in different layers using bioinformatics methods and information

151 in public databases. The result was a glucose-responsive transomic network in the

152 skeletal muscle of WT and *ob/ob* mice. **(B)** Definition of glucose-responsive molecules

153 using fold change and FDR-adjusted p value. **(C)** Definition of  $T_{1/2}$ , an index of the

154 temporal rate of response, and rapid and slow glucose-responsive molecules using  $T_{1/2}$ .

155 were connected when regulations could be speculated. By comparing the regulatory  
156 transomic networks between WT and *ob/ob* mice, we comprehensively evaluated how  
157 obesity affects the responses to glucose in skeletal muscle.

158

## 159 **Metabolomics**

160 We first performed metabolomics analysis using capillary electrophoresis–mass  
161 spectrometry (CE–MS), liquid chromatography (LC)–MS, and enzyme assays. A total  
162 of 104 water-soluble and ionic metabolites including glucose, amino acids, and nucleic  
163 acids were measured by CE–MS. Statistical tests were performed to identify the  
164 glucose-responsive metabolites in WT and *ob/ob* mice (Fig. 2A, B; Data File S1). To  
165 define an increase or decrease in time courses with changes in both directions at  
166 different time points, the direction of change compared to time 0 at the earliest time  
167 point that showed a significant change was used. Metabolites that showed statistically  
168 significant increases or decreases in WT or *ob/ob* mice are shown in Figure 2A. The  
169 responses were categorized into three groups (rapid, intermediate, or slow) according to  
170 their  $T_{1/2}$  values (Fig. 2C).

171 Four metabolites (4% of the total quantified metabolites) were significantly  
172 increased only in *ob/ob* mice, and none were increased in WT mice (Fig. 2B).  
173 Metabolites that were increased only in *ob/ob* mice included fructose 6-phosphate  
174 (F6P), tartrate, lactate, and isoamylamine (Fig. 2D). Twenty-one metabolites (20%)  
175 were significantly decreased only in WT mice, and four metabolites (4%) were  
176 significantly decreased only in *ob/ob* mice (Fig. 2B). It is noteworthy that no common  
177 metabolites were increased or decreased in WT and *ob/ob* mice. Metabolites decreased  
178 in WT mice included those that play a role in the tricarboxylic acid (TCA) cycle, such



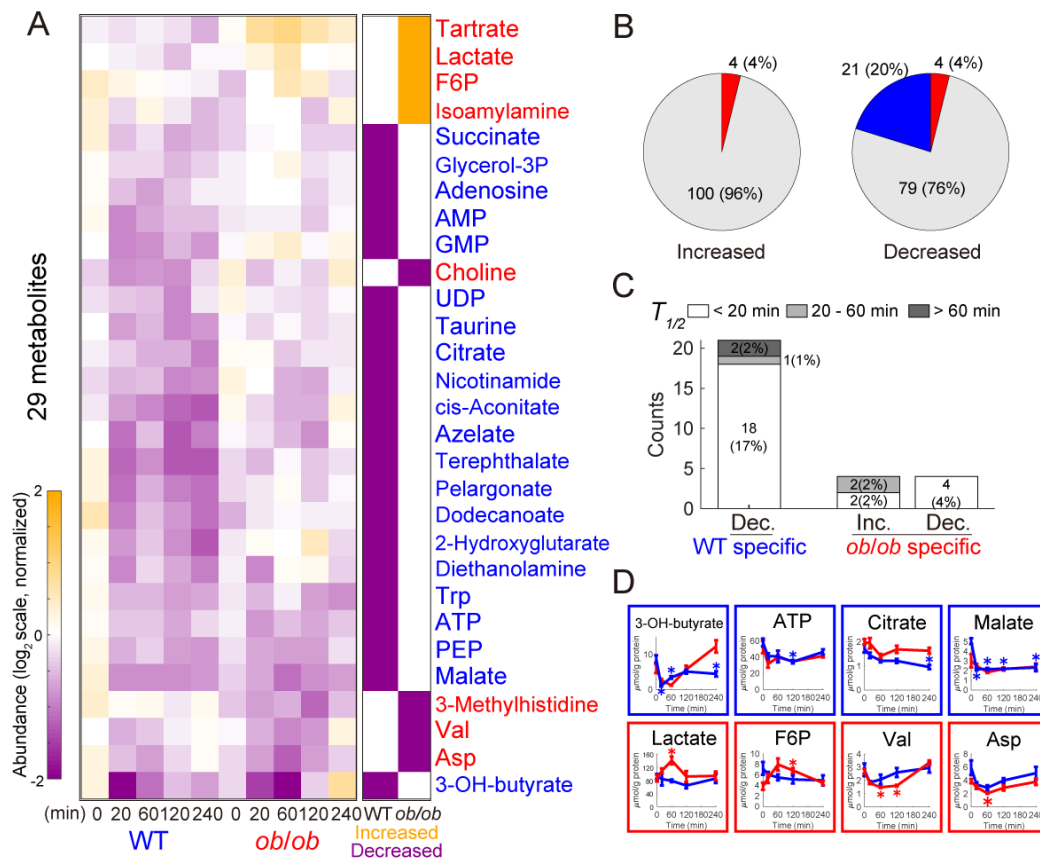

180 **Fig. 2. Identification of glucose-responsive metabolites.** (A) Left: Heat map of the  
 181 time courses of 29 glucose-responsive metabolites from the skeletal muscles of WT and  
 182 *ob/ob* mice following oral glucose administration. Right: The bars in the heat map are  
 183 colored according to the extent of glucose responsiveness, meaning the change from  
 184 fasting state (0 min) in WT and *ob/ob* mice: increased (orange), decreased (purple), or  
 185 were unchanged (white). Metabolites written in blue text indicate glucose-responsive  
 186 metabolites specific to WT mice; red text, specific to *ob/ob* mice. (B) Increased and  
 187 decreased metabolites in the skeletal muscles of WT mice and *ob/ob* mice. Blue, WT  
 188 specific; red, *ob/ob* specific. (C) Rapid, intermediate, and slow responses in glucose-  
 189 responsive metabolites. (D) Graphs showing the metabolites with responses that were  
 190 specific to WT mice (blue boxes) and specific to *ob/ob* mice (red boxes).

191 as citrate, cis-aconitate, succinate, and malate (Fig. 2D). The ketone body 3-  
192 hydroxybutylate (3-OH-butylate) was also decreased in WT mice. Metabolites that were  
193 decreased in *ob/ob* mice included valine, aspartic acid, choline, and 3-methylhistidine.  
194 Most of the decreased metabolites showed rapid responses in both WT and *ob/ob* mice  
195 (Fig. 2C). Hierarchical clustering analysis of the metabolites is shown in Figure S3.  
196 LC-MS did not detect significant responses of 14 lipids after oral glucose  
197 administration (Data File S2).

198 Our metabolomic analysis revealed that the number of glucose-responsive  
199 metabolites specific to WT mice (21: 0 increased + 21 decreased) was larger than that  
200 specific to *ob/ob* mice (8: 4 increased + 4 decreased), and no responses were common to  
201 both mice. These results indicate that there is a substantial difference in the mechanism  
202 of glucose metabolism in skeletal muscle between WT and *ob/ob* mice.

203 Next, we compared the metabolomic changes in the skeletal muscle and blood.  
204 The amount of metabolites was regulated not only within each organ but in the blood  
205 circulatory system (Katz and Tayek, 1998). For each metabolite that was measurable in  
206 both skeletal muscle and blood (61 metabolites), we calculated the correlation between  
207 the time course of the metabolites in the skeletal muscle and that in the blood (Fig.  
208 S4A). The blood data were obtained from our previous study (Kokaji et al., 2020). The  
209 decreases in 3-OH-butyrate, isoleucine, and leucine were highly correlated between the  
210 blood and muscle in WT mice; and the decreases in 3-OH-butyrate and increases in  
211 lactate were highly correlated between the blood and muscle in *ob/ob* mice (Fig. S4A,  
212 B). Our previous study showed that 3-OH-butyrate, isoleucine, and leucine also  
213 exhibited a high correlation between the blood and liver in the same mouse (Kokaji et

214 al., 2020). These results suggest that metabolites regulated in the bloodstream are  
215 regulated similarly in skeletal muscle and liver.

216

## 217 **Transcriptomics**

218 To elucidate the transcriptional changes and controls in the skeletal muscle of WT and  
219 *ob/ob* mice after glucose administration, we performed transcriptomic analysis using  
220 RNA sequencing. Of the 14,978 genes analyzed, 4,264 that were significantly changed  
221 after oral glucose administration were identified as glucose-responsive genes (Fig. 3A,  
222 B; Data File S3). A heatmap of the glucose-responsive genes is shown in Figure 3A.  
223 The responses were categorized into three groups (rapid, intermediate, or slow)  
224 according to their  $T_{1/2}$ s as in the analysis of the metabolites (Fig. 3C, D). Pathway  
225 enrichment analysis was also performed for each type of response (Table 1 and Data  
226 File S4). We assigned glucose-responsive genes encoding metabolic enzymes to the  
227 Enzyme layer of the transomic network, and glucose-responsive genes encoding  
228 transcription factors to the TF layer of the transomic network (Figs. 1 and 5).

229 The number of upregulated and downregulated genes in WT and *ob/ob* mice is  
230 shown in Figure 3B. The number of glucose-responsive genes specific to *ob/ob* mice  
231 (1,414 upregulated, 995 downregulated) was larger than that specific to WT mice (624  
232 upregulated, 472 downregulated). A total of 637 common genes were upregulated and  
233 264 were downregulated in WT and *ob/ob* mice. The calculation of time constants  
234 revealed that the number of rapidly responding glucose-responsive genes was larger in  
235 *ob/ob* mice than in WT mice (Fig. 3C). Genes upregulated in both WT and *ob/ob* mice  
236 included those involved in central carbon metabolism, such as hexokinase 2 (*Hk2*), fatty  
237 acid synthase (*Fasn*), and stearyl-coenzyme A (CoA) desaturase 1(*Scd1*), and the

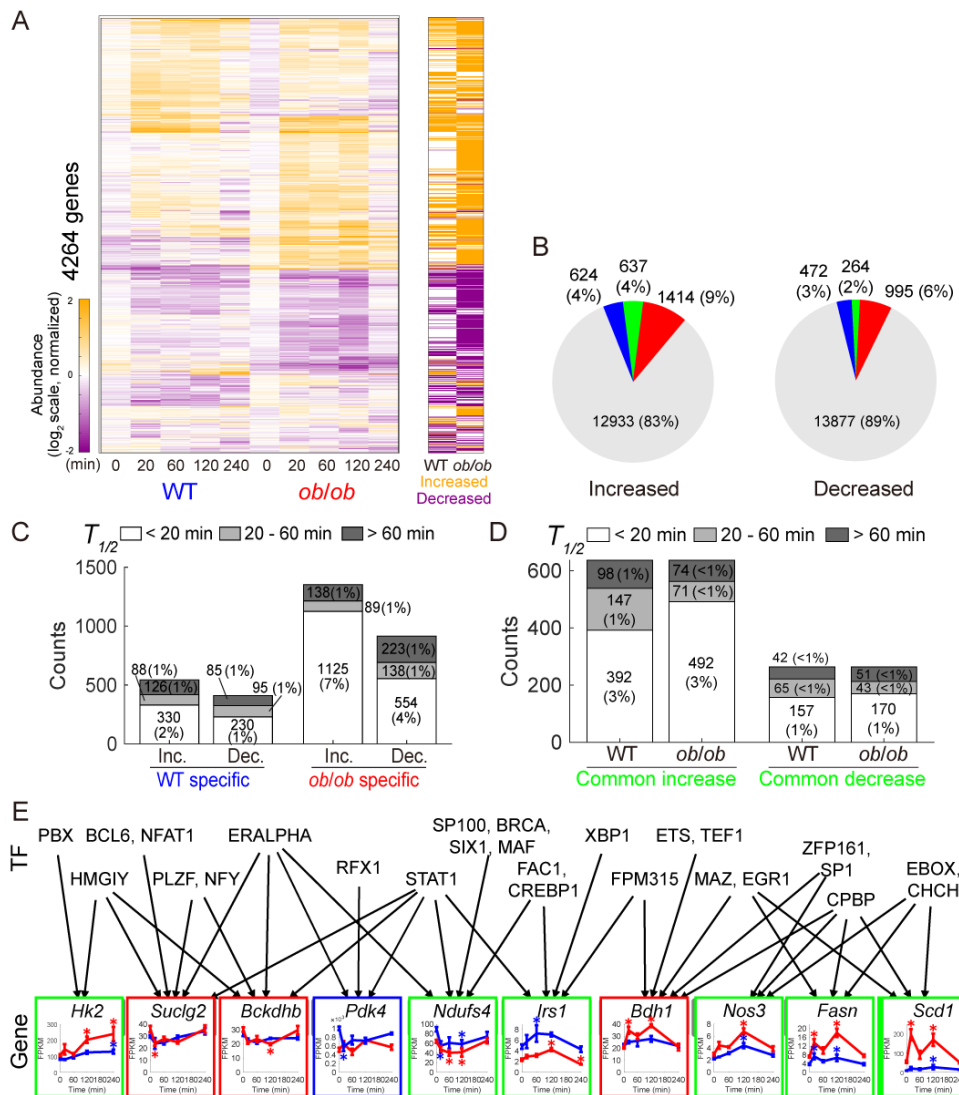

239 **Fig. 3. Identification of glucose-responsive genes.** (A) Left: Heat map of the time  
 240 courses of transcript abundance for 4,264 glucose-responsive genes in the skeletal  
 241 muscles of WT and *ob/ob* mice. Right: The bars in the heat map are colored according  
 242 to glucose responsiveness: upregulated (orange) and downregulated (purple). (B)  
 243 Increased and decreased genes in the skeletal muscle of WT mice and *ob/ob* mice. Blue,  
 244 WT specific; red, *ob/ob* specific; green, glucose-responsive genes common to both. (C  
 245 and D) Rapid, intermediate, and slow responses in glucose-responsive genes. (E)  
 246 Graphs showing the gene expression time courses for the indicated genes. The inferred  
 247 regulatory connections are shown as arrows from transcription factors to genes.

249 **Table 1. Pathway enrichment analysis of the glucose-responsive genes.**

250 Pathways with p value < 0.05 are shown.

|                                       | Upregulated<br>gene in WT                 |                      | Downregulated<br>gene in WT              |                      | Unchanged<br>gene in WT                                             |                      |                                                                                  |                      |
|---------------------------------------|-------------------------------------------|----------------------|------------------------------------------|----------------------|---------------------------------------------------------------------|----------------------|----------------------------------------------------------------------------------|----------------------|
|                                       | activity                                  | p value              | activity                                 | p value              | activity                                                            | p value              | activity                                                                         | p value              |
| Upregulated<br>gene in <i>ob/ob</i>   | Adherens<br>junction                      | $8.1 \times 10^{-3}$ |                                          |                      | Gap junction                                                        | $1.1 \times 10^{-3}$ | Focal adhesion                                                                   | $8.8 \times 10^{-3}$ |
|                                       | Butirosin and<br>neomycin<br>biosynthesis | $9.4 \times 10^{-3}$ |                                          |                      | Adherens junction                                                   | $2.8 \times 10^{-3}$ | Regulation of actin<br>cytoskeleton                                              | $1.2 \times 10^{-2}$ |
|                                       |                                           |                      |                                          |                      | Glycosaminoglycan<br>biosynthesis -<br>heparan sulfate /<br>heparin | $5.6 \times 10^{-3}$ | Glycosaminoglycan<br>biosynthesis -<br>chondroitin sulfate<br>/ dermatan sulfate | $2.0 \times 10^{-2}$ |
|                                       |                                           |                      |                                          |                      | Signaling pathways<br>regulating<br>pluripotency of<br>stem cells   | $6.3 \times 10^{-3}$ |                                                                                  |                      |
| Downregulated<br>gene in <i>ob/ob</i> |                                           |                      | Histidine<br>metabolism                  | $3.6 \times 10^{-2}$ | Proteasome                                                          | $2.7 \times 10^{-3}$ | Mismatch repair                                                                  | $3.7 \times 10^{-2}$ |
|                                       |                                           |                      |                                          |                      | Ribosome                                                            | $1.0 \times 10^{-2}$ | Retinol metabolism                                                               | $4.3 \times 10^{-2}$ |
|                                       |                                           |                      |                                          |                      | Arachidonic acid<br>metabolism                                      | $2.5 \times 10^{-2}$ | Drug metabolism -<br>other enzymes                                               | $4.9 \times 10^{-2}$ |
|                                       |                                           |                      |                                          |                      | Non-homologous<br>end-joining                                       | $3.0 \times 10^{-2}$ |                                                                                  |                      |
| Unchanged<br>gene in <i>ob/ob</i>     | Histidine<br>metabolism                   | $3.0 \times 10^{-3}$ | Taurine and<br>hypotaurine<br>metabolism | $1.3 \times 10^{-2}$ |                                                                     |                      |                                                                                  |                      |
|                                       | Phenylalanine<br>metabolism               | $1.2 \times 10^{-2}$ | Drug<br>metabolism -<br>other enzymes    | $2.4 \times 10^{-2}$ |                                                                     |                      |                                                                                  |                      |
|                                       | beta-Alanine<br>metabolism                | $1.4 \times 10^{-2}$ |                                          |                      |                                                                     |                      |                                                                                  |                      |

251

252 responses in *ob/ob* mice were larger than those in WT mice (Fig. 3E). Some genes  
253 involved in the insulin signaling pathway also showed upregulation common to both  
254 WT and *ob/ob* mice, such as insulin receptor substrate 1 (*Irs1*) and nitric oxide synthase  
255 3 (*Nos3*) (Fig. 3E). Genes downregulated in both WT and *ob/ob* mice included those  
256 involved in oxidative phosphorylation such as NADH dehydrogenase (ubiquinone) iron-  
257 sulfur protein 4 (*Ndufs4*) (Fig. 3E). Genes specifically downregulated in WT mice  
258 contained pyruvate dehydrogenase kinase 4 (*Pdk4*) (Fig. 3E). Genes specifically  
259 upregulated in *ob/ob* mice were relatively enriched in pathways related to cell adhesion  
260 (Table 1). The gene 3-hydroxybutyrate dehydrogenase 1 (*Bdh1*), which is involved in  
261 ketone body metabolism, was also specifically upregulated in *ob/ob* mice. Genes  
262 specifically downregulated in *ob/ob* mice included those involved in the TCA cycle  
263 such as succinyl-CoA synthetase beta subunit (*Suclg2*), and those involved in branched-  
264 chain amino acid (BCAA) degradation such as 2-oxoisovalerate dehydrogenase beta  
265 subunit (*Bckdhb*) (Fig. 3E). Genes specifically downregulated in *ob/ob* mice were  
266 relatively enriched in the proteasome pathway and ribosomal proteins (Table 1).

267         Next, we performed hierarchical clustering analysis of transcriptome data and  
268 bioinformatics analysis of the binding motifs of gene clusters using the transcription  
269 factor database TRANSFAC (Figs. 3E and S5A, B; Data Files S5 and S6) to estimate  
270 the regulatory connections between transcription factors and genes (Kel et al., 2003;  
271 Matys et al., 2006). We predicted the regulatory connections between a transcription  
272 factor and a gene if the binding motifs of the transcription factor were enriched in the  
273 promoter regions of the genes in a cluster. For example, we inferred that early growth  
274 response protein 1 (*Egr1*) is a transcription factor that regulates some of the genes  
275 upregulated in WT and *ob/ob* mice (Fig. 3E). A comparison of the estimated regulatory

276 connections with those predicted from chromatin immunoprecipitation (ChIP)  
277 experimental data from the ChIP-Atlas database (<http://chip-atlas.org/>) (Oki et al., 2018)  
278 showed that the results from the two methods mostly overlapped (Fig. S5C; Data File  
279 S7). The estimated regulatory connections between the transcription factors and the  
280 genes encoding metabolic enzymes acted as connections between the TF layer and the  
281 Enzyme layer in the transomic network.

282

### 283 **Phosphorylation of insulin signaling molecules**

284 Phosphorylation is an important factor for regulating metabolic reactions. Direct  
285 phosphorylation of an enzyme can regulate its activity, and phosphorylation of a  
286 transcription factor can regulate the expression level of downstream enzymes.  
287 Therefore, we measured the phosphorylation of 10 enzymes, transcription factors, and  
288 signaling molecules in the insulin pathway by performing western blot analysis of  
289 protein samples prepared from the skeletal muscle of WT and *ob/ob* mice during oral  
290 glucose administration (Fig. S6; Data File S8). The band intensities were quantified, and  
291 the results were used to determine if the phosphorylation was glucose-responsive.

292 We were able to detect many glucose-responsive phosphorylated proteins from  
293 the analysis (Fig. 4). The level of phosphorylated ribosomal protein S6 was increased in  
294 both WT and *ob/ob* mice. The phosphorylation of Akt was specifically increased in WT  
295 mice, and the phosphorylation of glycogen phosphorylase was specifically decreased in  
296 WT mice. Glycogen synthase kinase 3  $\beta$  (Gsk3 $\beta$ ) and cAMP response element-binding  
297 protein (Creb) were specifically increased in *ob/ob* mice. Some molecules showed the  
298 opposite responses in WT and *ob/ob* mice. For example, the phosphorylation of  
299 forkhead box protein 1 (Foxo1) was transiently increased in WT mice but decreased in

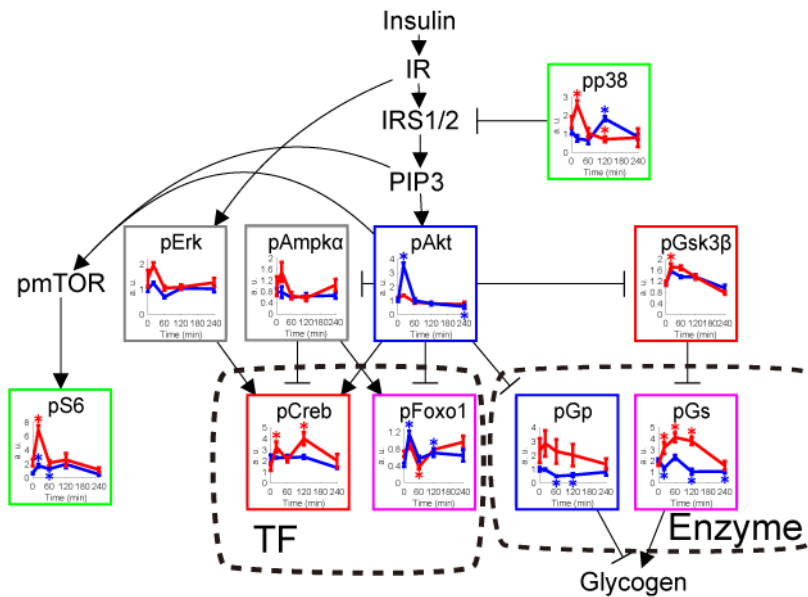

301 **Fig. 4. Identification of glucose-responsive phosphorylation of insulin signaling**  
302 **molecules.** Time courses of the phosphorylation of the indicated insulin signaling  
303 molecules in the skeletal muscle of WT mice (blue lines) and *ob/ob* mice (red lines)  
304 following oral glucose administration. Phosphorylated proteins are indicated by the  
305 prefix “p.” The time course graphs are presented in the context of the insulin signaling  
306 pathway from the KEGG database (Kanehisa et al., 2012, 2017). The colors of the  
307 boxes around each graph indicate the change in phosphorylation specific to WT (blue),  
308 specific to *ob/ob* (red), common to both (green), opposite between WT and *ob/ob* mice  
309 (pink). Proteins that did not exhibit a change in phosphorylation are outlined in gray.  
310 Glucose-responsive molecules in the TF and Enzyme layers are enclosed in dashed  
311 boxes.



312 *ob/ob* mice; the phosphorylation of glycogen synthase (Gs) was decreased in WT mice  
313 and increased in *ob/ob* mice. The phosphorylation of extracellular signal-related kinase  
314 (Erk) and AMP-activated protein kinase  $\alpha$  ( $Ampk\alpha$ ) was not affected by glucose  
315 administration in both WT and *ob/ob* mice. In the subsequent transomic analysis,  
316 metabolic enzymes with glucose-responsive phosphorylation were assigned to the  
317 Enzyme layer, and transcription factors with glucose-responsive phosphorylation were  
318 assigned to the TF layer.

319

### 320 **Regulatory glucose-responsive transomic network**

321 A regulatory transomic network of glucose-responsive molecules in the skeletal muscle  
322 was constructed with five layers: Insulin signal, TF, Enzyme, Reaction, and Metabolite  
323 (Fig. 5; Data File S9). We constructed the transomic network in the skeletal muscle  
324 using a method we previously developed for the transomic network in the liver (Kokaji  
325 et al., 2020). Briefly, glucose-responsive molecules were assigned to the corresponding  
326 layers as nodes, and the edges between the nodes were drawn to show the interlayer  
327 regulatory connections of glucose-responsive molecules retrieved from pathway  
328 databases such as Kyoto Encyclopedia of Genes and Genomes (KEGG) and  
329 Braunschweig Enzyme Database (BRENDA) (Kanehisa et al., 2012, 2017; Schomburg  
330 et al., 2013) (Fig. 5A).

331 By constructing regulatory transomic networks in WT and *ob/ob* mice, we were  
332 able to identify WT specific, *ob/ob* specific, and common responses of molecules and  
333 interlayer regulatory connections to glucose administration (Fig. 5B; green, common;  
334 blue, WT specific; red, *ob/ob* specific). In the Metabolite layer, the number of WT mice  
335 specific glucose-responsive molecules was larger than *ob/ob* mice specific glucose-

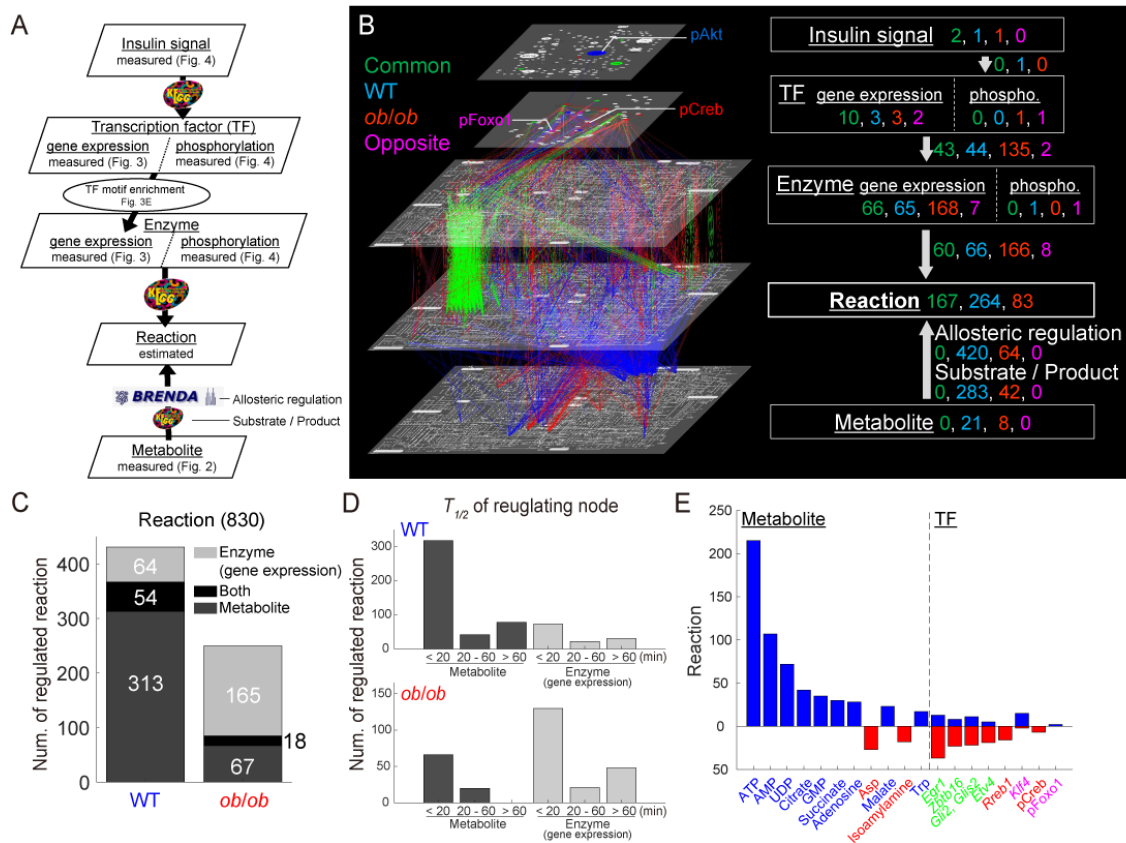

337 **Fig. 5. Construction of a regulatory transomic network for glucose-responsive**  
 338 **metabolic reactions. (A)** The procedure for constructing the regulatory transomic  
 339 network for glucose-responsive metabolic reactions. The databases used to identify the  
 340 interlayer regulatory connections are shown by arrows. **(B)** The regulatory transomic  
 341 network for glucose-responsive metabolic reactions. **(C)** The number of glucose-  
 342 responsive metabolic reactions regulated by glucose-responsive molecules in the  
 343 Enzyme layer, Metabolite layer, or both. **(D)** The number of glucose-responsive  
 344 metabolic reactions regulated by glucose-responsive metabolites and genes with the  
 345 indicated time constants  $T_{1/2}$  in WT mice and *ob/ob* mice. **(E)** The number of glucose-  
 346 responsive metabolic reactions regulated by the indicated glucose-responsive molecules  
 347 in WT mice (upper, blue) and *ob/ob* mice (lower, red). The colors of the names of  
 348 molecules indicate the type of glucose-responsive molecules as described in (B).

349 responsive molecules, and no molecules responded commonly in WT and *ob/ob* mice.  
350 Therefore, most of the interlayer regulatory connections between the Metabolite layer  
351 and the Reaction layer were specific to WT mice, suggesting that metabolic regulation  
352 by a metabolite itself after glucose administration is impaired in obesity. By contrast,  
353 approximately 55% of glucose-responsive genes in the Enzyme layer and the interlayer  
354 regulatory connections between the Enzyme layer and the Reaction layer were classified  
355 as *ob/ob* specific, suggesting that transcriptional regulation compensated for the  
356 regulation by metabolites that was lost in obese mice. The number of common glucose-  
357 responsive genes in the Enzyme layer and its regulatory connections was approximately  
358 40% of the *ob/ob* specific ones.

359         The numbers of glucose-responsive metabolic reactions regulated by  
360 metabolites (Metabolite layer), genes (Enzyme layer), or both were calculated (Fig. 5C).  
361 The results suggested that the metabolic reactions in WT mice were mainly regulated by  
362 metabolites, and those in *ob/ob* mice were mainly regulated through gene expression.  
363 We also classified the regulators of metabolic reactions according to their time constants  
364 ( $T_{1/2}$ ), and revealed that a large number of metabolic reactions was affected by the  
365 rapidly responding (<20 min) metabolites and genes in both the WT and *ob/ob* networks  
366 (Fig. 5D). Glucose-responsive metabolites specific to WT mice included cofactors such  
367 as ATP, AMP, and UDP, which could have a large effect on the Reaction layer (Fig. 5E).

368

### 369 **Comparison of the regulatory transomic networks of WT and *ob/ob* mice**

370 To analyze how each metabolic pathway was regulated in the regulatory transomic  
371 networks of WT and *ob/ob* mice, we constructed a simplified transomic network using a  
372 method that we previously developed (Kokaji et al., 2020) (Fig. 6A, B; Data File S10).

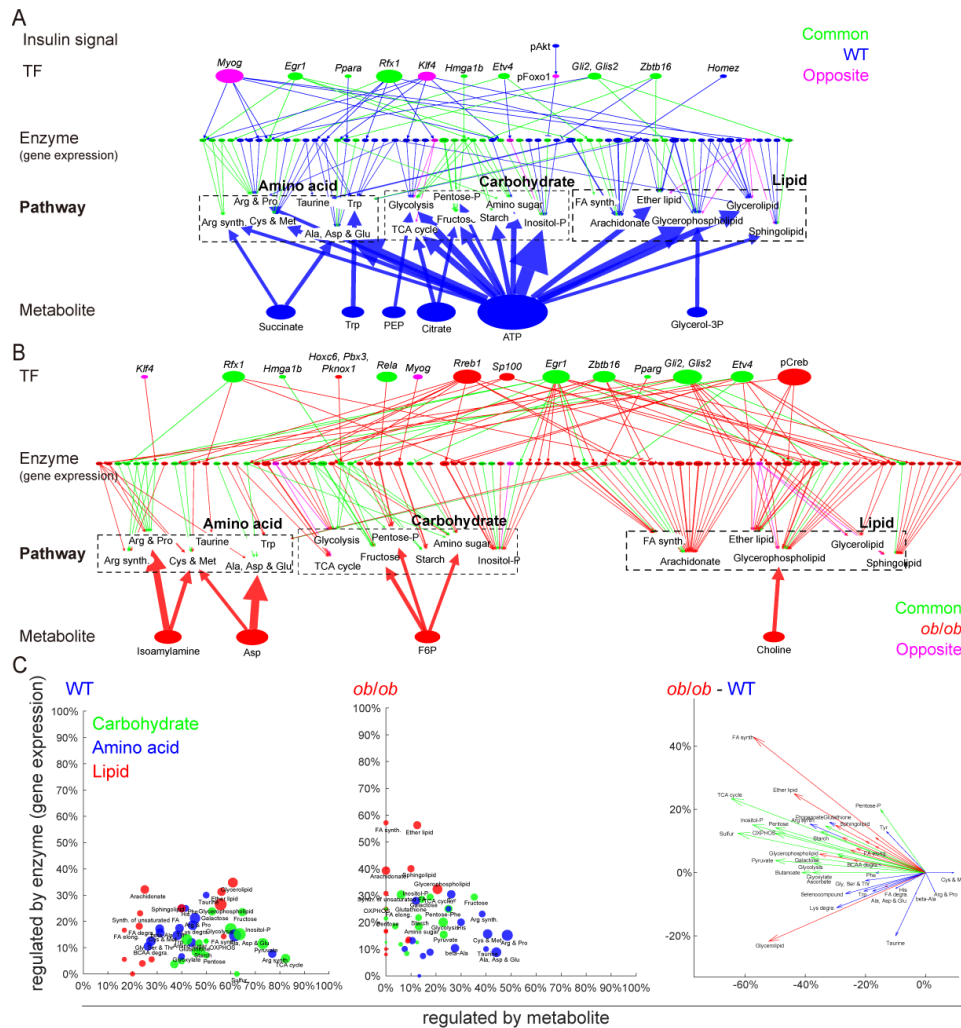

374 **Fig. 6. Condensed regulatory transomic networks for glucose-responsive metabolic**  
 375 **reactions. (A, B)** The condensed regulatory transomic network of the response to  
 376 glucose in WT and *ob/ob* mice. The color of nodes (glucose-responsive molecules) and  
 377 edges (interlayer regulatory connections) indicate the type of molecules and regulation  
 378 as described in Figure 5B. The size of the nodes and width of the edges indicate the  
 379 relative number of the regulated metabolic reactions. **(C)** For each metabolic pathway  
 380 node, the percentage of regulated metabolic reactions by glucose-responsive metabolites  
 381 (*x*-axis) and glucose-responsive genes encoding metabolic enzymes (*y*-axis) was plotted  
 382 for WT and *ob/ob* mice.

383 Briefly, we converted the Reaction layer into the Pathway layer by placing metabolic  
384 reactions in a specific metabolic pathway into a single metabolic pathway node,  
385 according to the KEGG metabolic pathway.

386 In WT mice, various metabolic pathways were regulated by metabolites (Fig.  
387 6A). In particular, carbohydrate metabolic pathways were regulated by WT specific  
388 glucose-responsive metabolites such as ATP, citrate, and phosphoenolpyruvate (PEP)  
389 (Fig. S7). Although the effects of glucose-responsive genes encoding metabolic  
390 enzymes were smaller than the metabolites, some lipid metabolic pathways such as  
391 glycerolipid and glycerophospholipid metabolisms were more strongly regulated by  
392 glucose-responsive genes than others (Fig. 6C). In *ob/ob* mice, the regulation of  
393 glucose-responsive metabolites was decreased and that of glucose-responsive genes  
394 encoding metabolic enzymes was increased (Fig. 6B). The decreased regulation by  
395 metabolites was particularly large in carbohydrate metabolic pathways (Fig. 6C).  
396 Regulation by glucose-responsive genes was increased in most carbohydrate and lipid  
397 metabolic pathways, with the exception of glycerolipid metabolism. Amino acid  
398 metabolic pathways showed relatively small changes in the percentage of metabolic  
399 reactions regulated by glucose-responsive metabolites and genes.

400

#### 401 **Glycolysis, TCA cycle, BCAA degradation, and ketone body metabolism**

402 Finally, we focused on metabolic pathways and their regulatory networks related to  
403 glucose (Fig. 7).

404

405

406

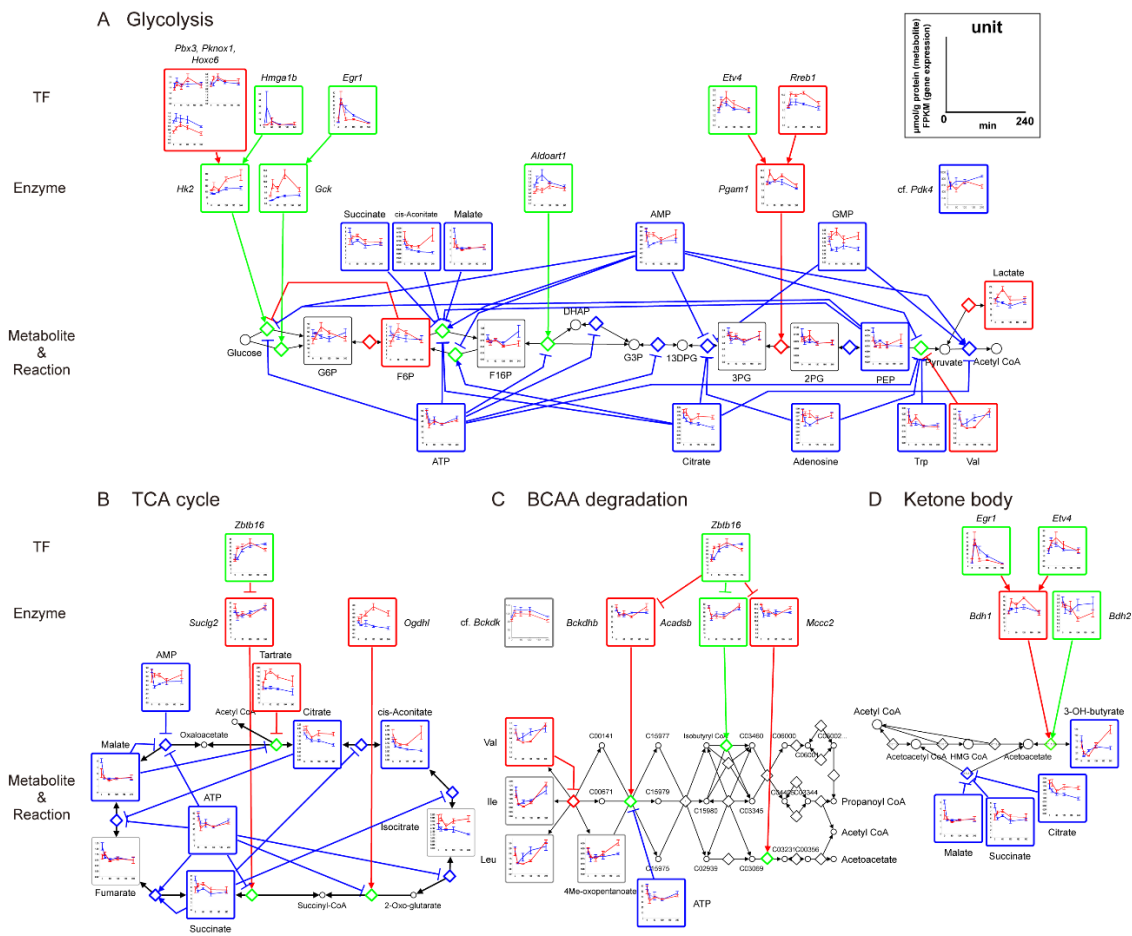

408 **Fig. 7. Regulatory transomic network for glucose-responsive metabolic reactions in**  
 409 **glycolysis, TCA cycle, BCAA degradation, and ketone body metabolism.** The  
 410 regulatory transomic network for glucose-responsive metabolic reactions in glycolysis  
 411 (A), TCA cycle (B), BCAA degradation (C), and ketone body metabolism (D) in the  
 412 skeletal muscle of WT mice and *ob/ob* mice. Graphs of the time courses of measured  
 413 molecules are shown for corresponding nodes as the means and SEMs. The colors of the  
 414 frames and edges indicate WT mice-specific glucose-responsive molecules and  
 415 regulatory connections (blue), *ob/ob* mice-specific glucose-responsive molecules and  
 416 regulatory connections (red), and common glucose-responsive molecules and regulatory  
 417 connections and regulatory connections (green). Diamond nodes indicate metabolic  
 418 reactions.

419 *Glycolysis*

420 In WT mice, although blood glucose levels increased after glucose administration, most  
421 metabolites in glycolysis were not defined as “glucose-responsive.” The glycolysis  
422 network contained many allosterically regulated WT-specific glucose-responsive  
423 metabolites. The decrease in allosteric inhibitors such as ATP and citrate could  
424 contribute to the activation of glycolysis in WT mice. We also found upregulation in  
425 some glycolytic genes such as *Hk2*, and downregulation in *Pdk4*, which inhibits  
426 pyruvate dehydrogenase by phosphorylation (Furuyama et al., 2003). This activation of  
427 glycolysis by glucose-responsive molecules might account for the increased influx of  
428 glucose from the blood.

429 In *ob/ob* mice, most allosteric regulation was lost, and *Hk2* showed a larger  
430 increase than in WT mice, suggesting that the lack of allosteric regulation may be  
431 compensated for by gene expression. Because the increase in blood glucose levels was  
432 greater than that in WT mice, the increase in F6P and lactate might be caused by an  
433 imbalance between increased glucose uptake and activation of glycolytic flux. Glucose  
434 6-phosphate (G6P) was not defined as a glucose-responsive molecule (q value at 60 min  
435 = 0.14), but its time series was highly correlated with F6P (Pearson’s  $r = 0.99$ ). The  
436 results are shown in Figure 7A.

437

438 *TCA cycle*

439 In WT mice, four metabolites in the TCA cycle decreased after oral glucose  
440 administration (citrate, cis-aconitate, succinate, malate). Although fumarate was not  
441 defined as a glucose-responsive molecule (q value at 60 min = 0.13), its time series was  
442 highly correlated with malate (Pearson’s  $r = 0.96$ ). The responses might have caused a



443 decrease in TCA cycle flux and ATP production. The decrease in metabolites in the TCA  
444 cycle may be the result of decreased acetyl CoA production derived from  $\beta$  oxidation  
445 and ketone body degradation, as well as decreased amino acid degradation and  
446 anaplerosis (Dimitriadis et al., 2011a; Furuyama et al., 2003; Puchalska and Crawford,  
447 2017; Saxton and Sabatini, 2017). In *ob/ob* mice, the abundance of some metabolites  
448 was smaller than that in WT mice before glucose administration, and the metabolites did  
449 not show a large response to glucose. The results are shown in Figure 7B. Some studies  
450 have reported a decrease in intermediates of the TCA cycle in the skeletal muscle of  
451 obese mice (Koves et al., 2008; Wong et al., 2015).

452

#### 453 *BCAA degradation*

454 BCAA degradation pathway and its regulatory network included some glucose-  
455 responsive molecules in *ob/ob* mice. Valine showed a rapid decrease after oral glucose  
456 administration. Leucine and isoleucine were not defined as glucose-responsive  
457 molecules (q value at 20 min = 0.15, 0.16), but their time series were highly correlated  
458 with valine (Pearson's  $r = 0.98$  for leucine,  $0.98$  for isoleucine). The responses may be  
459 due to the inhibition of protein degradation by insulin stimulation (Dimitriadis et al.,  
460 2011b; Saxton and Sabatini, 2017). Some genes involved in BCAA degradation, such as  
461 *Bckdhb*, showed a rapid downregulation. Bckdh kinase (Bckdk) inhibits Bckdh by  
462 phosphorylation (Lynch and Adams, 2014), which was not defined as a glucose-  
463 responsive molecule (q value at 60 min = 0.11), but its time series was negatively  
464 correlated with *Bckdhb* expression (Pearson's  $r = -0.96$ ). The transcriptional responses,  
465 as well as the decrease in BCAA abundance, might suppress BCAA degradation. We  
466 found a similar decrease in *Suclg2* in the TCA cycle, which metabolizes succinyl CoA,



467 one of the BCAA degradation products (Fig. 7B). In WT mice, BCAAs were not  
468 defined as glucose-responsive molecules (q value at 20 min = 0.15 to 0.23), but their  
469 time series showed a positive correlation with those in *ob/ob* mice (Pearson's  $r = 0.77$  to  
470 0.90) (Fig. 7c).

471

#### 472 *Ketone body metabolism*

473 In WT mice, 3-OH butyrate, a ketone body, showed a rapid and strong decrease (0.13-  
474 fold at 20 min). The decrease in metabolites in the TCA cycle, which allosterically  
475 inhibit the metabolic enzyme that degrades acetoacetate, might contribute to the  
476 degradation of ketone bodies in the skeletal muscle. In *ob/ob* mice, 3-OH butyrate did  
477 not show a significant decrease (q value at 60 min = 0.12), but *Bdh1* was rapidly  
478 upregulated (Fig. 7D).

479

#### 480 **Discussion**

481 In this study, we performed transomic analysis of the skeletal muscles obtained from  
482 WT and *ob/ob* mice after the oral glucose tolerance test to construct a large-scale  
483 glucose-responsive regulatory network of metabolism. In WT mice, the number of  
484 glucose-responsive metabolites was about 2.5-fold larger than that in *ob/ob* mice, and  
485 many metabolic reactions were affected by these glucose-responsive metabolites. In  
486 particular, the responses of cofactors such as ATP, and TCA cycle intermediates such as  
487 citrate and succinate, might affect carbohydrate and amino acid metabolism. By  
488 contrast, the number of glucose-responsive genes encoding metabolic enzymes in *ob/ob*  
489 mice was about 1.8-fold larger than that in WT mice, and the genes were mainly related  
490 to carbohydrate and lipid metabolism.

491 We also found some characteristic glucose-responsive regulatory pathways in  
492 central carbon, branched amino acids, and ketone body metabolism. The WT mice  
493 showed few significant changes in the metabolites of glycolysis despite the  
494 administration of glucose. A recent study showed that the influx of orally administered  
495 glucose into the glycolysis of gastrocnemius muscle (white muscle), which was used in  
496 this study, is much smaller than that of soleus muscle (red muscle) (Lopes et al., 2021).  
497 The decrease in ATP and TCA cycle intermediates also suggested a decrease in TCA  
498 cycle flux. Because blood lactate increased (Fig. S4B), much of the glucose imported  
499 into the skeletal muscle might be released into the blood as lactate (Brooks, 2020; Hui  
500 et al., 2020). In *ob/ob* mice, the increase in *Hk2* and F6P indicated an increase in  
501 glycolytic flux. In addition, blood lactate increased and TCA cycle intermediates did not  
502 respond, suggesting that the conversion of imported glucose to lactate might also occur  
503 in *ob/ob* mice.

504 In this study, some amino acids including BCAA in the blood and skeletal  
505 muscle were decreased after glucose administration similar to the effect on the liver  
506 (Kokaji et al., 2020), suggesting suppression of protein degradation and promotion of  
507 protein synthesis in the insulin target organs (Dimitriadis et al., 2011b; Ruvinsky and  
508 Meyuhas, 2006). In addition, we found the transcriptional activation of *Bckdk*, a known  
509 regulator of the BCAA degradation pathway, and transcriptional repression of the  
510 metabolic enzymes, including *Bckdhb*, in *ob/ob* mice. These responses might suppress  
511 the degradation of amino acids in the skeletal muscle. The blood level of a ketone body,  
512 an alternative energy source in the fasting state, was decreased in both WT and *ob/ob*  
513 mice after glucose administration. We also found that ketone levels in skeletal muscle  
514 showed a similar time series as those in the blood, suggesting that intramuscular ketone

515 utilization was also reduced. Decreased degradation of these metabolites could  
516 contribute to a decrease in TCA cycle intermediates, but further research is needed to  
517 understand why the reduction was specific to WT mice.

518 We previously constructed a glucose-responsive transomic network in the liver  
519 of WT and *ob/ob* mice (Kokaji et al., 2020). The liver network contained more glucose-  
520 responsive molecules and regulatory connections than the skeletal muscle network, but  
521 the differences between WT and *ob/ob* mice were similar between the liver and skeletal  
522 muscle. In both organs, many metabolic reactions in the WT networks were regulated  
523 by metabolites, whereas in the *ob/ob* networks, much of the regulation by metabolites  
524 was lost and metabolic regulation by gene expression was activated. There were also  
525 similarities in the regulation of the metabolic pathway, such as the regulation of  
526 carbohydrate metabolism by metabolites and the regulation of lipid metabolism by gene  
527 expression. We are currently performing a detailed comparative analysis between the  
528 liver network and skeletal muscle network.

529 To construct a comprehensive glucose-responsive network, it was necessary to  
530 integrate more omics data into our network. Because the Insulin signal layer was  
531 determined by western blot analysis, the numbers of glucose-responsive molecules and  
532 regulatory connections of the layer were very limited compared to those of the other  
533 layers. Integration of phosphoproteomic data and kinase-substrate interactions will  
534 facilitate a more extensive evaluation of the effects from the Insulin signal layer to the  
535 Reaction layer (Humphrey et al., 2013; Krycer et al., 2017; Ohno et al., 2020). The  
536 transcription factors of the glucose-responsive genes were determined based on the  
537 binding motifs in the promoter sequences and the temporal patterns. Because not all  
538 motifs are bound by transcription factors, direct measurements of transcription factor

539 binding using ChIP sequencing analysis will identify a more accurate and extensive  
540 regulatory network of glucose-responsive genes (Chèneby et al., 2018; Oki et al., 2018;  
541 Yevshin et al., 2019). Although our transomic network was not comprehensive, we  
542 revealed several important features of metabolic regulation in the skeletal muscle after  
543 glucose administration. An extension of this *in vivo* transomic analysis will lead to a  
544 better understanding of glucose homeostasis at the whole-body level and its  
545 dysregulation in obesity.

546

## 547 **Materials and Methods**

### 548 **Animals and sample preparation**

549 Animal experiments were performed as previously described (Kokaji et al., 2020).  
550 C57BL/6 WT mice or *ob/ob* mice at ten weeks of age were purchased from Japan SLC  
551 Inc. (Shizuoka, Japan). Animal experiments were approved by the animal ethics  
552 committee of The University of Tokyo. Overnight-fasted mice were administered an  
553 oral glucose load of 2 g/kg body weight. To measure blood glucose and insulin levels,  
554 15  $\mu$ L blood was collected from the tail veins at 0, 2, 5, 10, 15, 20, 30, 45, 60, 90, 120,  
555 180, and 240 min after glucose administration (n = 5). We used the blood glucose and  
556 insulin levels measured in our previous study (Kokaji et al., 2020) (Fig. S2). For the  
557 metabolome and transcriptome studies, mice were sacrificed at 0, 20, 60, 120, and 240  
558 min after glucose administration, and the gastrocnemius muscle was excised. Muscle  
559 samples were frozen immediately in liquid nitrogen and homogenized with dry ice. The  
560 powdered samples were divided and used for metabolomics, lipidomics,  
561 transcriptomics, a glycogen assay, and western blotting.

562

563 **Metabolomics**

564 Metabolomic analysis was performed as previously described (Kokaji et al., 2020).  
565 Total metabolites and proteins were extracted from the skeletal muscle with  
566 methanol:chloroform:water (2.5:2.5:1) extraction. Approximately 40 mg of the skeletal  
567 muscle was suspended in 500  $\mu$ L ice-cold methanol containing internal standards (20  
568  $\mu$ M L-methionine sulfone [Wako, Osaka, Japan], 2-morpholinoethanesulfonic acid,  
569 monohydrate [Dojindo, Kumamoto, Japan], and D-camphor-10-sulfonic acid [Wako])  
570 for normalization of MS peak intensities across runs, followed by suspension in 500  $\mu$ L  
571 chloroform, and finally in 200  $\mu$ L water. After centrifugation at  $4,600 \times g$  for 15 min at  
572  $4^{\circ}\text{C}$ , the aqueous layer was filtered through a 5 kDa molecular weight cutoff filter  
573 (Millipore, Burlington, MA, USA) to remove protein contamination. The filtrate (320  
574  $\mu$ L) was lyophilized and, prior to MS analysis, dissolved in 50  $\mu$ L water containing  
575 reference compounds (200  $\mu$ M each of trimesate [Wako] and 3-aminopyrrolidine  
576 [Sigma-Aldrich, St. Louis, MO, USA]). Proteins were precipitated by adding 800  $\mu$ L  
577 ice-cold methanol to the interphase and organic layers and centrifuged at  $12,000 \times g$  for  
578 15 min at  $4^{\circ}\text{C}$ . The pellet was washed with 1 mL ice-cold 80% (v/v) methanol and  
579 resuspended in 1 mL sample buffer containing 1% sodium dodecyl sulfate (SDS) and 50  
580 mM Tris-Cl pH8.8, followed by sonication. The total protein concentration was  
581 determined by the bicinchoninic acid (BCA) assay and was used for the normalization  
582 of metabolite concentration among samples.

583 All CE-MS experiments were performed using the Agilent 1600 Capillary  
584 Electrophoresis system (Agilent Technologies Santa Clara, CA, USA), the G1603A  
585 Agilent CE-MS adapter kit, and the G1607A Agilent CE electrospray ionization (ESI)–  
586 MS sprayer kit. Briefly, to analyze the cationic compounds, a fused silica capillary (50

587  $\mu\text{m}$  internal diameter [i.d.]  $\times$  100 cm) was used with 1 M formic acid as the electrolyte  
588 (Soga and Heiger, 2000). Methanol/water (50% v/v) containing 0.01  $\mu\text{M}$  hexakis(2,2-  
589 difluoroethoxy)phosphazene was delivered as the sheath liquid at 10  $\mu\text{L}/\text{min}$ . ESI-time-  
590 of-flight (TOF) MS was performed in the positive ion mode, and the capillary voltage  
591 was set to 4 kV. Automatic recalibration of each acquired spectrum was achieved using  
592 the masses of the reference standards ( $[^{13}\text{C}$  isotopic ion of a protonated methanol dimer  
593  $(2 \text{ MeOH}+\text{H})^+$ ,  $m/z$  66.0631 and [hexakis(2,2-difluoroethoxy)phosphazene +H] $^+$ ,  $m/z$   
594 622.0290). To identify the metabolites, the relative migration times of all peaks were  
595 calculated by normalization to the reference compound 3-aminopyrrolidine. The  
596 metabolites were identified by comparing their  $m/z$  values and relative migration times  
597 to the metabolite standards. Quantification was performed by comparing peak areas to  
598 calibration curves generated using internal standardization techniques with methionine  
599 sulfone. The other conditions were identical to those previously described (Soga et al.,  
600 2006). To analyze anionic metabolites, a commercially available COSMO(+)  
601 (chemically coated with cationic polymer) capillary (50  $\mu\text{m}$  i.d.  $\times$  105 cm) (Nacalai  
602 Tesque, Kyoto, Japan) was used with a 50 mM ammonium acetate solution (pH 8.5) as  
603 the electrolyte. Methanol/5 mM ammonium acetate (50% v/v) containing 0.01  $\mu\text{M}$   
604 hexakis(2,2-difluoroethoxy)phosphazene was delivered as the sheath liquid at 10  
605  $\mu\text{L}/\text{min}$ . ESI-TOF MS was performed in the negative ion mode, and the capillary  
606 voltage was set to 3.5 kV. For anion analysis, trimesate and D-camphor-10-sulfonic acid  
607 were used as the reference and internal standard, respectively. The other conditions  
608 were identical to those described previously (Soga et al., 2009). Agilent MassHunter  
609 software (Agilent technologies) was used for data analysis (Ishii et al., 2007; Soga et al.,  
610 2006, 2009).

611 We used the blood metabolome data obtained in our previous study (Kokaji et  
612 al., 2020).

613

#### 614 **Lipidomics**

615 Lipidomic analysis was performed as previously described (Egami et al., 2021).

616 Lipidomic profiling of the skeletal muscle was performed by Metabolon, Inc.

617 (Morrisville, NC, USA). Lipids were extracted from samples with dichloromethane and

618 methanol using the modified Bligh and Dyer procedure in the presence of internal

619 standards, with the lower organic phase used for analysis. The extracts were

620 concentrated under nitrogen and reconstituted in 0.25 mL dichloromethane:methanol

621 (50:50) containing 10 mM ammonium acetate. The extracts were placed in vials for

622 infusion–MS analyses, which were performed on the SelexION equipped Sciex 5500

623 QTRAP mass spectrometer using both the positive and negative ion modes. Each

624 sample was subjected to two analyses, with ion mobility spectrometry–MS conditions

625 optimized for lipid classes monitored in each analysis. The 5500 QTRAP was operated

626 in the multiple reaction monitoring mode to monitor the transitions for more than 1,100

627 lipids from up to 14 lipid classes. Individual lipid species were quantified based on the

628 ratio of the signal intensity for target compounds to the signal intensity for an assigned

629 internal standard of known concentration. Fourteen lipid class concentrations were

630 calculated from the sum of all molecular species within a class.

631

#### 632 **Glycogen assay**

633 Glycogen content was determined as previously described with some modifications

634 (Noguchi et al., 2013). Approximately 20 mg of the skeletal muscle was digested with

635 1.2 mL of 30% (w/v) potassium hydroxide solution for 1 h at 95°C and neutralized with  
636 61.2 µL glacial acetic acid. The total protein concentration of the muscle digest was  
637 determined by the BCA assay and adjusted to 1 µg protein/µL. Glycogen was extracted  
638 from the digested skeletal muscle using Bligh and Dyer method to remove lipids (Von  
639 Wilamowitz-Moellendorff et al., 2013). The digested skeletal muscle (50 µL) was  
640 mixed with 120 µL ice-cold methanol, 50 µL chloroform, 10 µL of 1% (w/v) linear  
641 polyacrylamide, and 70 µL water. After incubation on ice for 30 min, the mixture was  
642 centrifuged at  $12,000 \times g$  to remove the separated aqueous layer. The glycogen was  
643 precipitated by the addition of 200 µL methanol and centrifugation at  $12,000 \times g$  for 30  
644 min at 4°C, washed with ice-cold 80% (v/v) methanol, and dried completely. Glycogen  
645 pellets were suspended in 20 µL of 0.1 mg/mL amyloglucosidase (Sigma-Aldrich) in 50  
646 mM sodium acetate buffer and incubated for 2 h at 55°C to digest the glycogen. The  
647 concentration of the glucose produced from the glycogen was determined using the  
648 Amplex Red Glucose/Glucose Oxidase Assay kit (Thermo Fisher Scientific, Waltham,  
649 MA, USA), according to the manufacturer's instructions.

650

## 651 **Transcriptomics**

652 Transcriptomic analysis was performed as previously described (Kokaji et al.,  
653 2020). Total RNA was extracted from the skeletal muscle using the RNeasy Mini Kit  
654 (QIAGEN, Hilden, Germany) and QIAshredder (QIAGEN); the quantity was assessed  
655 using the Nanodrop (Thermo Fisher Scientific) and the quality was assessed using the  
656 2100 Bioanalyzer (Agilent Technologies). cDNA libraries were prepared using the  
657 SureSelect strand-specific RNA library preparation kit (Agilent Technologies). The  
658 resulting cDNAs were subjected to 100 base paired-end sequencing on the Illumina



659 HiSeq2500 Platform (Illumina, San Diego, CA, USA) (Matsumoto et al., 2014).  
660 Sequences were aligned to the mouse reference genome obtained from the Ensembl  
661 database (Cunningham et al., 2015; Flicek et al., 2014) (GRCm38/mm10, Ensembl  
662 release 97) using the STAR software package (v.2.5.3a) with the parameters “--  
663 quantMode TranscriptomeSAM --outFilterMultimapScoreRange 1 --  
664 outFilterMultimapNmax 20 --outFilterMismatchNmax 10 --alignIntronMax 500000 --  
665 alignMatesGapMax 100000 --sjdbScore 2 --alignSJDBoverhangMin 1 --genomeLoad  
666 NoSharedMemory --outFilterMatchNminOverLread 0.33 --  
667 outFilterScoreMinOverLread 0.33 --sjdbOverhang 100 --outSAMattributes NH HI NM  
668 MD AS XS --outSAMunmapped Within --outSAMtype BAM SortedByCoordinate --  
669 outSAMheaderHD @HD VN:1.4 --limitBAMsortRAM 103079215104 --  
670 outSAMstrandField intronMotif” (Dobin et al., 2013). The RSEM tool (v.1.3.0) was  
671 used to assemble transcript models (Ensembl release 97) from aligned sequences and to  
672 estimate gene expression level with the parameters “--estimate-rspd --forward-prob 0.5 -  
673 p 12” (Li and Dewey, 2011). Gene expression level was shown as fragments per  
674 kilobase of exon per million mapped fragments (FPKM).

675

### 676 **Western blot analysis**

677 Total proteins were extracted from the skeletal muscle with methanol:chloroform:water  
678 (2.5:2.5:1). Ice-cold methanol was added to the skeletal muscle at a concentration of  
679 100 mg/mL of the weight of the skeletal muscle, and the suspension (400  $\mu$ L) was  
680 mixed with chloroform (400  $\mu$ L) and water (160  $\mu$ L), followed by centrifugation at  
681 4,600  $\times g$  for 10 min at 4°C. The aqueous and organic phases were removed and 800  $\mu$ L  
682 ice-cold methanol was added to the interphase to precipitate proteins. The resulting

683 pellet was suspended with 400  $\mu$ L lysis buffer (10 mM Tris-HCl [pH 6.8] in 1% SDS)  
684 and incubated for 15 min at 65°C, followed by sonication. The protein lysate was  
685 centrifuged at 12,000  $\times$  g for 3 min at 4°C to remove debris. The total protein  
686 concentration of the resulting supernatant was determined by the BCA assay. The  
687 following primary antibodies were purchased from Cell Signaling Technology  
688 (Danvers, MA, USA): phosphorylated Erk1/2 (p-Erk1/2, Thr<sup>202</sup>/Tyr<sup>204</sup>; #9101), pCreb  
689 (Ser<sup>133</sup>; #9198), pAkt (Ser<sup>473</sup>; #9271), pS6 (Ser<sup>235</sup>/Ser<sup>236</sup>; #2211), pGsk3 $\beta$  (Ser<sup>9</sup>; #9336),  
690 pGs (Ser<sup>641</sup>; #3891), pFoxo1 (Ser<sup>256</sup>; #9461), pp38 (Thr<sup>180</sup>/Tyr<sup>182</sup>; #9211), and pAmpk $\alpha$   
691 (Thr<sup>172</sup>; #2531); pGp (Ser<sup>15</sup>) was made in house as previously described (Noguchi et al.,  
692 2013). The proteins (10  $\mu$ g) were resolved by SDS-PAGE, electrotransferred to  
693 nitrocellulose membranes, and incubated with the appropriate antibodies.  
694 Immunodetection was performed using the Immobilon Western Chemiluminescent HRP  
695 Substrate (Millipore) or SuperSignal West Pico PLUS Chemiluminescent Substrate  
696 (Thermo Fisher Scientific), and the Western blot signals were detected using a  
697 luminoimage analyzer (LAS-4000; Fujifilm) and quantified with ImageJ software.

698

### 699 **Identification of glucose-responsive molecules**

700 Glucose-responsive molecules were determined as previously described (Kokaji et al.,  
701 2020). Molecules that were detected in less than half of the replicates in either WT or  
702 *ob/ob* mice at any time point after oral glucose administration were removed from the  
703 analysis. A molecule with a statistically significant change in response to oral glucose  
704 administration was defined as a glucose-responsive molecule according to the following  
705 criteria. The fold change of the mean amount at each time point over the mean amount  
706 at fasting state (0 min) was calculated for each molecule. The significance of change at

707 each time point was tested by the two-tailed Welch's *t*-test for each metabolite and  
708 phosphorylation, and by the edgeR package (version 3.26.8) of the R language (version  
709 3.6.1) with the default parameters for each gene (Robinson et al., 2009). Metabolite,  
710 gene, and phosphorylation that showed an absolute  $\log_2$  fold change  $\geq 0.585$  ( $2^{0.585} =$   
711 1.5) and an FDR-adjusted p value (q value)  $\leq 0.1$  at any time point were defined as a  
712 glucose-responsive metabolite (Fig. 2A, B), gene (Fig. 3A, B), and phosphorylation  
713 (Fig. 4). The q values were calculated by Storey's procedure (Storey, 2002). To define  
714 an increase or decrease in time courses with changes in both directions at different  
715 times, we used the direction of change compared to time 0 at the earliest time point that  
716 showed a significant change.

717

### 718 **Clustering analysis**

719 Time courses for each metabolite of WT mice and *ob/ob* mice were normalized by  
720 dividing by the geometric mean of the values of WT mice and *ob/ob* mice in the fasting  
721 state (0 min) followed by  $\log_2$  transformation. We combined the two time courses of  
722 WT and *ob/ob* mice for each metabolite and performed hierarchical clustering of the  
723 combined time courses using Euclidean distance and Ward's method (Fig. S3). Based  
724 on the clustering tree, we defined eight different clusters of metabolites, showing  
725 similar or different responses between WT and *ob/ob* mice.

726 Clustering analysis of gene expression was performed as previously described  
727 with some modifications (Kokaji et al., 2020). Time courses for the expression of each  
728 gene of WT and *ob/ob* mice were normalized by subtracting the average expression  
729 values of the time courses of both mice and then dividing the resulting values by the

730 standard deviation (*Z*-score normalization). We combined the two time courses of WT  
731 and *ob/ob* mice for each gene and performed hierarchical clustering of the combined  
732 time courses using Euclidean distance and Ward's method (Fig. S7A). The genes with  
733 significant differences between WT and *ob/ob* mice before glucose administration (0  
734 min) (*q* value < 0.1) or a significant response at any time point in either WT or *ob/ob*  
735 mice (*q* value < 0.1) were selected for the clustering analysis (12301 genes). For the  
736 selection, the *p* value was calculated using the edgeR package (version 3.26.8) of the R  
737 language (version 3.6.1) with the default parameters (Robinson et al., 2009), and the *q*  
738 value was calculated by Storey's procedure (Storey, 2002).

739

#### 740 **Pathway enrichment analysis**

741 We performed pathway enrichment analysis of glucose-responsive genes (Table 1; Data  
742 File S4). The enrichment of the genes in each pathway was determined using the one-  
743 tailed Fisher's exact test. We used the genes detected in more than half of the replicates  
744 in WT and *ob/ob* mice at all time points as background. We used the pathways in  
745 Metabolism, Genetic Information Processing, and Cellular Processes from the KEGG  
746 database (Kanehisa et al., 2012, 2017).

747

#### 748 **Prediction of the transcription factor binding motif and inference of regulatory 749 connections between transcription factors and genes**

750 Analysis of transcription factors was performed as previously described (Kokaji et al.,  
751 2020). The flanking regions around the major transcription start site of genes were  
752 extracted from GRCm38/mm10 (Ensembl, release 97) using Ensembl BioMart  
753 (Kinsella et al., 2011). The region from -300 bp to +100 bp of the major transcription

754 start site was defined as the flanking region, according to FANTOM5 analysis of the  
755 time course (Arner et al., 2015). The transcription factor binding motifs in each flanking  
756 region (fig. S5B) were predicted using TRANSFAC Pro, a transcription factor database,  
757 and Match, a transcription factor binding motif prediction tool (Kel et al., 2003; Matys  
758 et al., 2006). The threshold for each transcription factor binding motif prediction was set  
759 using extended vertebrate\_non\_redundant\_min\_FP.prf, a parameter set in TRANSFAC  
760 Pro (Kokaji et al., 2020).

761 For the inference of regulatory connections between transcription factors and  
762 genes, we performed transcription factor motif enrichment analysis of the genes in each  
763 cluster (Fig. S5B). The enrichment of transcription factor binding motif in the flanking  
764 regions of genes in each cluster was determined by the one-tailed Fisher's exact test,  
765 and transcription factor binding motifs with q value  $\leq 0.1$  were defined as significantly  
766 enriched. The q values were calculated by the Benjamini–Hochberg procedure (Yoav  
767 Benjamini, 1995). We used the genes analyzed in the hierarchical clustering as  
768 background. To reduce the number of statistical tests, the clusters that contained  $\geq 100$   
769 genes were analyzed. If a transcription factor binding motif was enriched in the  
770 promoter regions of the genes in a cluster, we inferred the regulatory connections  
771 between the corresponding transcription factor and the genes in the cluster. To avoid  
772 overestimation, we excluded a cluster from the inference if the transcription factor  
773 binding motif was more enriched in the children clusters that contained  $\geq 100$  genes. To  
774 compare the enrichment of transcription factor binding motifs between clusters, we  
775 calculated the odds ratio of the transcription factor binding motifs for each cluster.

776 For validation of the inferred regulatory connections, we examined the overlap  
777 between the inferred genes of each transcription factor and those predicted from

778 experimental ChIP data from the ChIP-Atlas database (Oki et al., 2018) (Fig. S5C). The  
779 genes for which ChIP sequencing peaks of a transcription factor were detected in the  
780 flanking region around the transcription start sites were obtained using “Target Genes,”  
781 a prediction tool in the ChIP-Atlas. We used the flanking regions from -1000 bp to  
782 +1000 bp of the transcription start sites in Target Genes. The overlap between the  
783 inferred genes and genes from ChIP data was determined by the one-tailed Fisher’s  
784 exact test, and those with q value  $\leq 0.1$  were defined as significant. The q values were  
785 calculated by the Benjamini–Hochberg procedure (Yoav Benjamini, 1995).

786

#### 787 **Insulin signaling pathway**

788 The insulin signaling pathway in Figure 4 is a subset of the nodes of the insulin  
789 signaling pathway in the KEGG database (mmu04910) (Kanehisa et al., 2012, 2017).  
790 We added regulatory input to Creb from the PI3K-Akt signaling pathway (mmu04151),  
791 MAPK signaling pathway (mmu04010), and AMPK signaling pathway (mmu04152),  
792 and regulatory input to FoxO1 from the FoxO signaling pathway (mmu04068) in the  
793 KEGG database. The edges from Akt to Ampk and from p38 to insulin receptor  
794 substrate were added according to previous studies (Archuleta et al., 2009; Jaiswal et  
795 al., 2019).

796

#### 797 **Construction of the regulatory glucose-responsive transomic network**

798 The transomic network was constructed as previously described with some  
799 modifications (Kokaji et al., 2020). The regulatory glucose-responsive transomic  
800 networks consisted of five layers, namely Insulin signal, TF, Enzyme, Reaction, and  
801 Metabolite, with interlayer regulatory connections (Fig. 5A, B). The Insulin signal layer

802 is the insulin signaling pathway constructed in our previous phosphoproteomic study  
803 (Kawata et al., 2018). We included in the Insulin signal layer signaling molecules that  
804 we analyzed by western blotting; we did not include transcription factors such as Foxo1,  
805 or metabolic enzymes such as Gs in this layer. The TF layer consisted of all  
806 transcription factors with an inferred regulatory connection (Fig. S7B). The Enzyme  
807 layer consisted of all metabolic enzymes in the pathways in Metabolism obtained from  
808 the KEGG database (Kanehisa et al., 2012, 2017). The Reaction layer consisted of the  
809 metabolic reactions (based on EC number) corresponding to the metabolic enzymes in  
810 the Enzyme layer. The Metabolite layer consisted of all metabolites analyzed by CE–  
811 MS. Only the molecules and reactions corresponding to genes that were expressed in at  
812 least one sample were included in the Insulin signal, TF, Enzyme, and Reaction layers.  
813 Not all 15,608 genes were included in the network.

814       Glucose-responsive molecules were assigned to the corresponding layers as  
815 nodes. The Insulin signal layer consisted of insulin signaling molecules with glucose-  
816 responsive phosphorylation. The TF layer consisted of transcription factors encoded by  
817 glucose-responsive genes or those with glucose-responsive phosphorylation. The  
818 Enzyme layer consisted of metabolic enzymes encoded by glucose-responsive genes or  
819 those with glucose-responsive phosphorylation. The Reaction layer consisted of  
820 “glucose-responsive metabolic reactions,” which were defined as metabolic reactions  
821 regulated by glucose-responsive molecules. The Metabolite layer consisted of glucose-  
822 responsive metabolites. We also determined the direction of glucose responsiveness. To  
823 determine a direction for time courses with both increased and decreased time points,  
824 we used the direction of change at the earliest time point with a significant difference

825 from time 0 (fasting state). We did not determine a direction (increase or decrease) for  
826 metabolic reactions because we did not measure metabolic reaction activity.

827 To determine regulatory connections from the Enzyme and Metabolite layers to  
828 the Reaction layer, both the target of the regulatory connection (a metabolic reaction)  
829 and the regulating molecule (enzyme or metabolite) had to be glucose-responsive.  
830 Among the Insulin signal, TF, and Enzyme layers, the interlayer regulatory connections  
831 were determined using the directions of glucose responsiveness of the regulating  
832 molecule and the regulated molecules, and the types of interlayer regulatory  
833 connections, which were designated as either positive or negative. We defined positive  
834 interlayer regulatory connections as when both the regulating molecule and regulated  
835 molecule showed the same direction of change, namely, both increased or both  
836 decreased. We defined negative interlayer regulatory connections as when the  
837 regulating molecule and regulated molecule showed responses in the opposite direction,  
838 namely, one increased and the other decreased.

839 The interlayer regulatory connections between glucose-responsive molecules  
840 were determined according to databases. The interlayer connections from the Insulin  
841 signal layer to the TF layer were determined by the regulation of transcription factors by  
842 kinases retrieved from the KEGG database (Kanehisa et al., 2012, 2017). The interlayer  
843 connections from the TF layer to the Enzyme layer were determined from inferred  
844 regulatory connections between transcription factors and genes (Fig. 3E). The interlayer  
845 connections from the Enzyme layer to the Reaction layer were determined by  
846 connecting metabolic reactions to their corresponding metabolic enzymes according to  
847 the KEGG database (Kanehisa et al., 2012, 2017). The interlayer connections from the  
848 Metabolite layer to the Reaction layer comprised two types of regulatory connections:



849 those mediated by allosteric regulators, which were retrieved from the BRENDA  
850 database (Schomburg et al., 2013), and those mediated by the substrate or product of the  
851 reaction, which were retrieved from the KEGG database (Kanehisa et al., 2012, 2017).  
852 The types of regulatory connections made by glucose-responsive transcription factors  
853 were defined according to the Gene Ontology (GO) annotations obtained from the  
854 Mouse Genome Database (Bult et al., 2008) (Data File S6). The transcription factors  
855 that were included in the list of DNA-binding transcription repressors (GO:0001227)  
856 and not in the list of DNA-binding transcription activators (GO:0001228) were defined  
857 as transcription repressors. Foxo1 was added to the list of transcription activators based  
858 on previous studies of gluconeogenesis (Barthel et al., 2005; Nakae et al., 2001). The  
859 effects of the phosphorylation of transcription factors on the types of regulatory  
860 connections were defined according to the KEGG database (Kanehisa et al., 2012,  
861 2017). We used the allosteric regulation reported for mammals (*Bos taurus*, *Felis catus*,  
862 *Homo sapiens*, “Macaca,” “Mammalia,” “Monkey,” *Mus booduga*, *Mus musculus*,  
863 *Rattus norvegicus*, *Rattus rattus*, *Rattus sp.*, *Sus scrofa*, “dolphin,” and “hamster”)  
864 according to the BRENDA database (Schomburg et al., 2013). Because the reversibility  
865 of metabolic reactions was not determined, metabolic reactions were assumed to be  
866 regulated by both the substrate and product.

867

## 868 **Generation of a condensed transomic network based on metabolic pathway** 869 **information**

870 We condensed the regulatory transomic networks as previously described with some  
871 modifications (Kokaji et al., 2020). First, we grouped the related metabolic reactions in  
872 a specific metabolic pathway into one “metabolic pathway node” (Pathway layer), and

873 classified the metabolic pathway nodes into three classes—carbohydrate, lipid, and  
874 amino acid—according to the KEGG database (Kanehisa et al., 2012, 2017). Second,  
875 we selected two types of metabolic pathway nodes: one was a pathway that exhibited  
876 significant associations with any glucose-responsive metabolites or transcription  
877 factors; the other was a pathway whose percentage of regulated reactions was in the top  
878 10% either by glucose-responsive metabolites or by glucose-responsive genes encoding  
879 metabolic enzymes (Fig. 6C). The association between the metabolic reactions in a  
880 metabolic pathway and those regulated by a glucose-responsive molecule was  
881 determined by the one-tailed Fisher’s exact test, and associations with a  $q$  value  $\leq 0.01$   
882 were defined as significant. The  $q$  values were calculated by the Benjamini–Hochberg  
883 procedure (Yoav Benjamini, 1995). We also selected glucose-responsive metabolites  
884 that exhibited significant associations with any metabolic pathway nodes and glucose-  
885 responsive transcription factors that regulate five or more metabolic enzymes. Third, we  
886 reduced the interlayer regulatory connections from the Metabolite layer to the Pathway  
887 layer by removing the interlayer regulatory connections that regulated fewer than five  
888 metabolic reactions.

889

## 890 **Implementation**

891 Statistical tests, clustering analysis, enrichment analysis, and transomic network  
892 analysis were done using MATLAB 2020a (The Mathworks Inc.). Visualization of  
893 transomic network in the Graph Modeling Language formats was done using Python 2.7  
894 and VANTED (Junker et al., 2006).

895

896 **Supplementary Materials:**

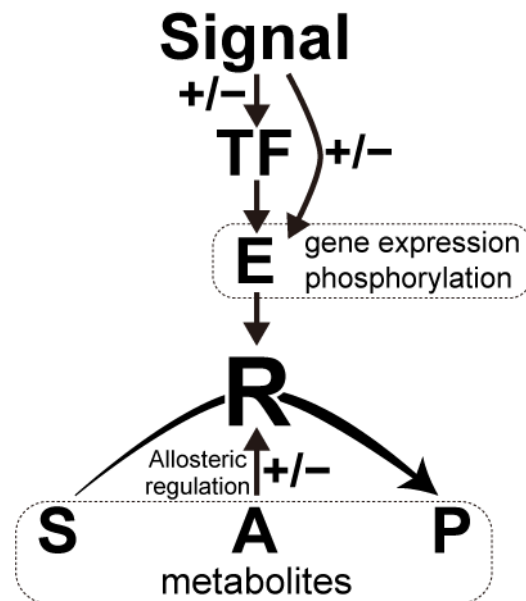

898 **Fig. S1. The regulatory network for metabolic reactions.** A generic metabolic  
899 reaction (R) is catalyzed by a metabolic enzyme (E) and involves metabolites that  
900 function as the substrate (S), product (P), or allosteric regulator (A). For reversible  
901 reactions, the product is also a substrate and the substrate is also a product (not shown).  
902 Positive and negative signs indicate positive and negative regulation, respectively.  
903 Regulation of a metabolic reaction by a metabolic enzyme consists of regulation by  
904 changing the amount of enzyme through gene expression and regulation by changing  
905 enzyme activity through posttranslational modifications, in particular phosphorylation.  
906 Gene expression is regulated by one or more transcription factors (TFs) and signaling  
907 molecules (Signals) regulate both transcription factor activity and metabolic enzyme  
908 activity by changing the phosphorylation status. This figure was modified from  
909 Supplementary Figure 1 of Kokaji et al. (2020).

910

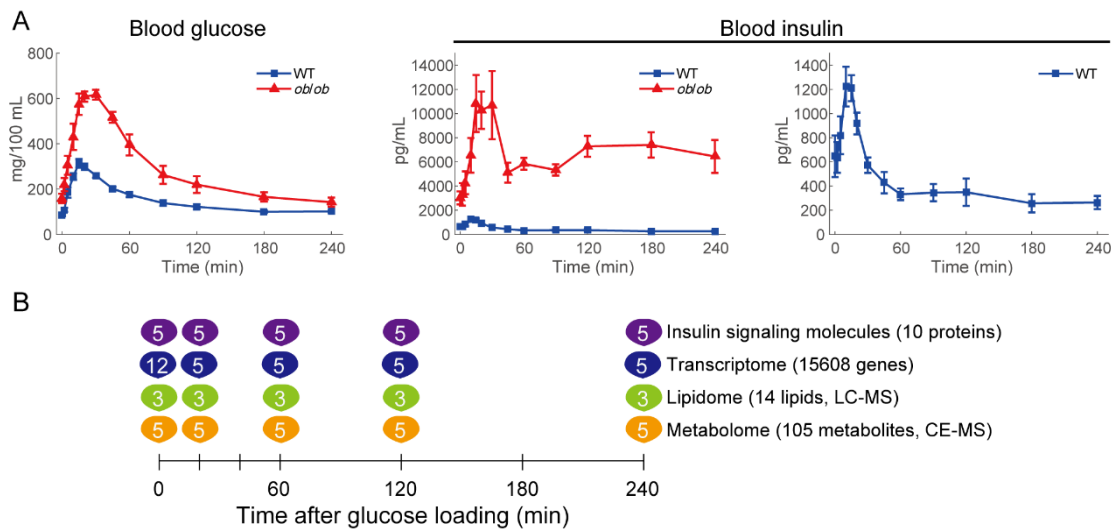

912 **Fig. S2. Oral glucose administration and multiomic measurements.** (A) Blood  
 913 glucose and blood insulin of WT mice (blue) and *ob/ob* mice (red) during oral glucose  
 914 administration. The data of blood glucose and insulin levels measured in our previous  
 915 study are shown (Kokaji et al., 2020). The means and SEMs of five mice per genotype  
 916 are shown. (B) We orally administered glucose to 16 h-fasting WT and *ob/ob* mice, and  
 917 collected the skeletal muscle at 0, 20, 60, 120, and 240 min after administration. We  
 918 performed metabolomics, transcriptomics, and Western blotting for the phosphorylation  
 919 of insulin signaling molecules in the skeletal muscle. The number of mice per genotype  
 920 in each measurement is shown at each time point. This figure was modified from  
 921 Supplementary Figure 2 of Kokaji et al. (2020).

922

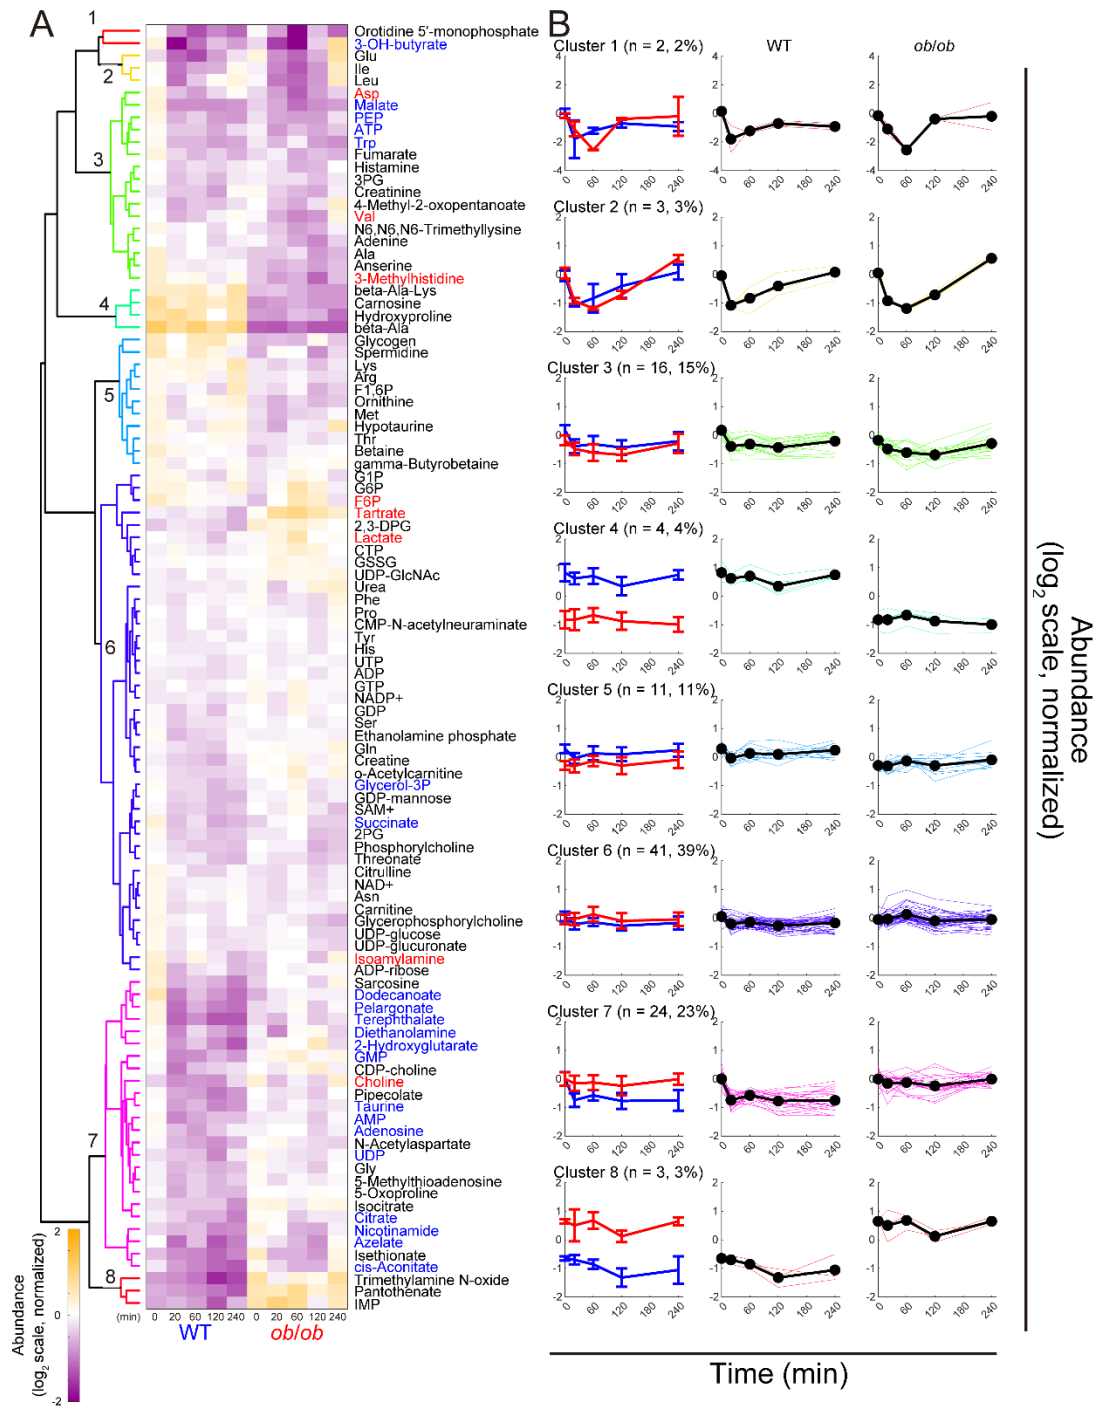

924 **Fig. S3. Hierarchical clustering of time courses of metabolites in the skeletal**  
 925 **muscle. (A)** The heat map and hierarchical clustering of the time courses of metabolites  
 926 in the skeletal muscles of WT and *ob/ob* mice following oral glucose administration.  
 927 The colors of and numbers on tree diagram indicate the cluster of each metabolite. To

928 investigate the changes from fasting state, two time courses of each metabolite were  
929 divided by the geometric mean of the values of WT mice and *ob/ob* mice in fasting state  
930 (0 min), and then log<sub>2</sub>-transformed. The colors of the names of metabolites indicate WT  
931 mice-specific glucose-responsive metabolites (blue), *ob/ob* mice-specific glucose-  
932 responsive metabolites (red), and metabolites that are not glucose-responsive (black).  
933 **(B)** Averaged time courses of the metabolites for all eight clusters. Left panel shows  
934 averaged time courses of the metabolites as the mean and standard deviation in a cluster  
935 for WT mice (blue) and *ob/ob* mice (red). Middle panel (WT mice) and right panel  
936 (*ob/ob* mice) show average (thick line) and individual (thin line) time courses of the  
937 metabolites in a cluster in WT or *ob/ob* mice.

938 Clusters 1, 2, and 3 was comprised of metabolites which were decreased in both WT  
939 and *ob/ob* mice, and the responses in cluster 1 were largest of the three clusters.  
940 Orotidine 5'-monophosphate and 3-OH-butyrate was classified in this cluster. The  
941 responses in cluster 2 were larger than those in cluster 3. Cluster 2 consisted of three  
942 amino acids; valine, leucine, and glutamate. Other amino acids (aspartate, valine,  
943 alanine, and tryptophan), downstream metabolites of the glycolytic pathway (3-  
944 phosphoglyceric acid [3PG] and phosphoenolpyruvate [PEP]) and metabolites of the  
945 TCA cycle (fumarate and malate) were classified into cluster 3. Cluster 4 included  
946 metabolites that were more abundant in WT mice at all timepoints. This cluster mainly  
947 comprised β-alanine, carnosine, a dipeptide of β-alanine and histidine, and β-alanine-  
948 lysine. Metabolites in cluster 5 were also more abundant in WT mice; however, the  
949 difference was smaller compared to cluster 4. This cluster mainly comprised amino  
950 acids such as lysine, arginine, threonine, and ornithine. Fructose 1,6-bisphosphate  
951 (F1,6BP) and glycogen was also classified into cluster 5. Metabolites in cluster 6 were

952 observed at slightly higher levels in *ob/ob* mice, and showed almost no changes by  
953 glucose administration. Many amino acids, metabolites of the central carbon  
954 metabolism, and nucleic acids were classified into this cluster. Metabolites of the  
955 glycolytic pathway, such as glucose-1-phosphate (G1P), glucose-6-phosphate (G6P),  
956 fructose 6-phosphate (F6P), and lactate were also included. Among these, F6P and  
957 lactate were significantly increased only in *ob/ob* mice. Metabolites in cluster 7 tended  
958 to decrease specifically in WT mice (14/24 metabolites showed significant decreases).  
959 Metabolites of the TCA cycle, such as citrate, isocitrate, and cis-aconitate, and nucleic  
960 acids (adenosine monophosphate [AMP], guanosine monophosphate [GMP], and  
961 adenosine) were included in this cluster. Metabolites in cluster 8 (inosine  
962 monophosphate, pantothenate, and trimethylamine N-oxide) were abundant in *ob/ob*  
963 mice compared to WT mice, and the difference was quite large.  
964

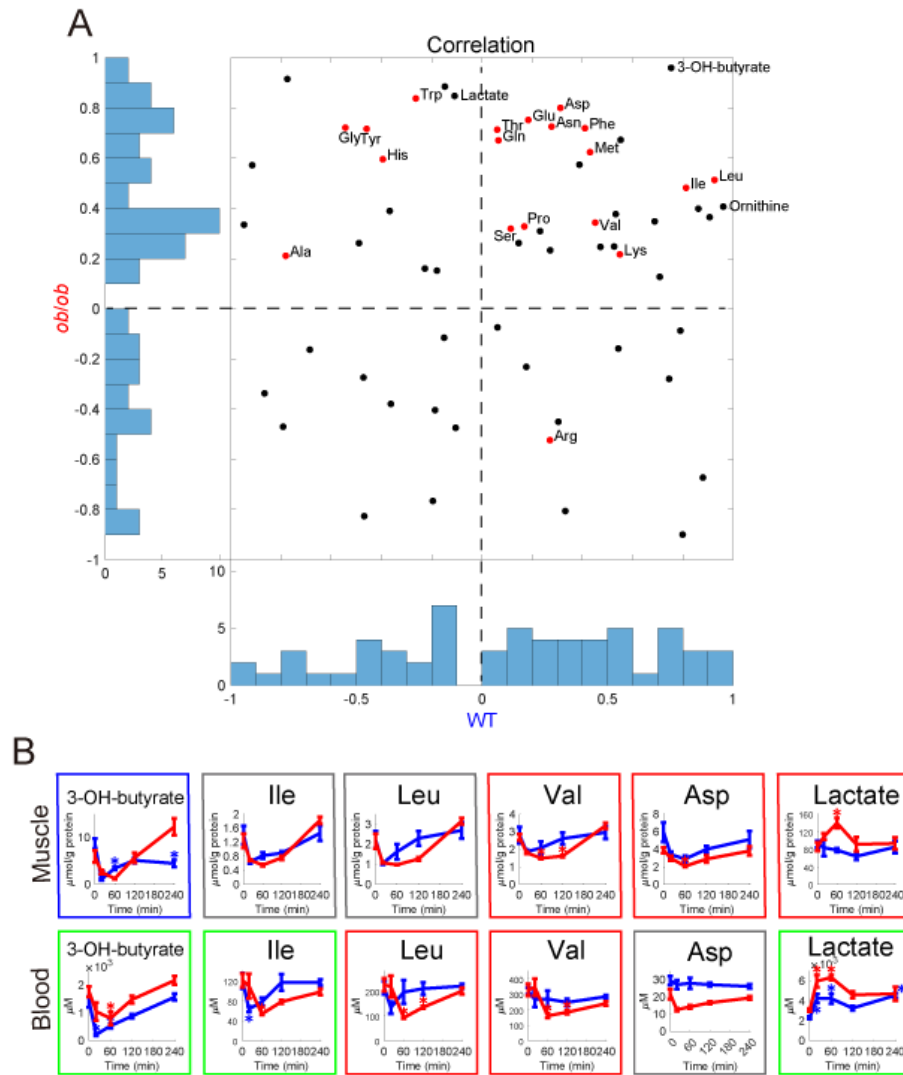

966 **Fig. S4. Time courses of metabolite changes in the skeletal muscle and in the blood.**

967 (A) Histograms and scatter plot of Pearson's correlation coefficients between the time  
 968 courses of changes in metabolites measured in skeletal muscle and blood in WT mice  
 969 and *ob/ob* mice. Red dots indicate 19 proteogenic amino acids measured in both skeletal  
 970 muscle and blood. (B) Time courses of changes in the indicated metabolites in the  
 971 skeletal muscle and blood of WT mice (blue) and *ob/ob* mice (red) following oral  
 972 glucose administration. The means and SEMs of five mice per genotype are shown. The  
 973 colors of the frames indicate common glucose-responsive metabolites (green), WT-  
 974 specific glucose-responsive metabolites (blue), *ob/ob*-specific glucose-responsive



975 metabolites (red), and not glucose-responsive metabolites either in WT mice or in *ob/ob*

976 mice (gray). \*q value < 0.1 and absolute log<sub>2</sub> fold change > 0.585.

977

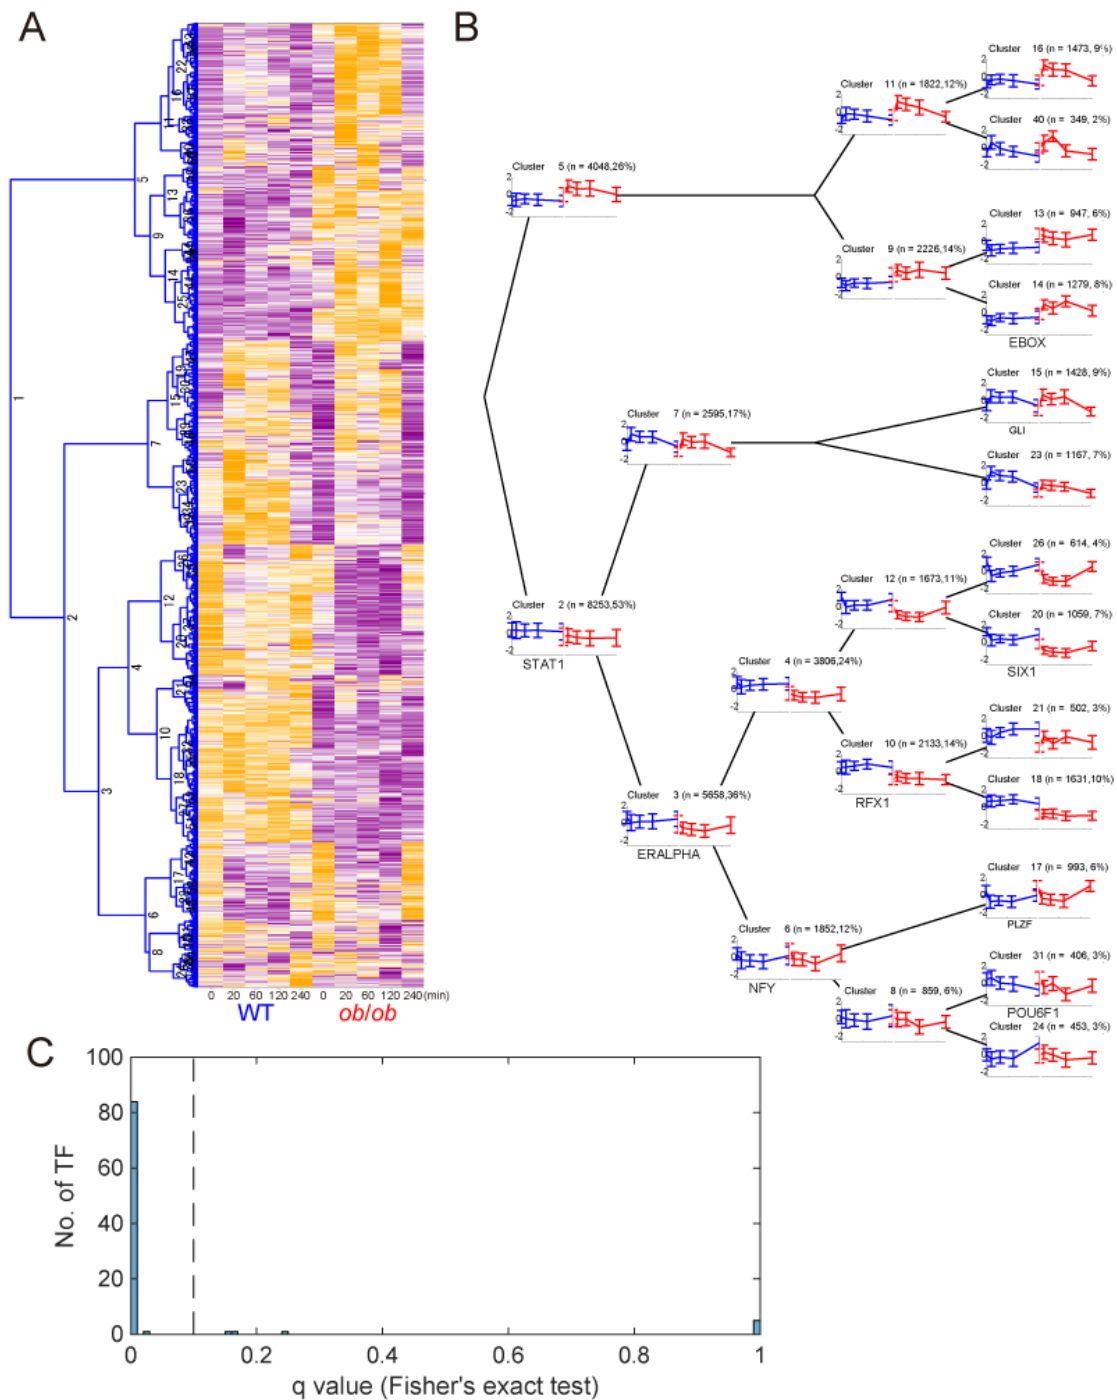

979 **Fig. S5. Hierarchical clustering of the time courses of gene expression in the**  
 980 **skeletal muscle and inference of regulatory connections between transcription**  
 981 **factors and genes. (A)** The heat map and hierarchical clustering of the Z-score  
 982 normalized time courses of gene expressions in the skeletal muscle of WT and *ob/ob*

983 mice following oral glucose administration. The hierarchical clustering was performed  
984 using Euclidean distance and Ward's method. The numbers on the tree diagram  
985 indicates the cluster identity. Each cluster includes only the genes that show a  
986 significant response at any time point either in WT mice or *ob/ob* mice or significant  
987 differences between WT mice and *ob/ob* mice before glucose administration (0 min).  
988 **(B)** The averaged time courses of the gene expression for each cluster of WT mice  
989 (blue) and *ob/ob* mice (red). The mean and standard deviation of the time courses of  
990 gene expressions in the cluster are shown. The time courses are presented on the tree  
991 diagram of hierarchical clustering. Significantly enriched transcription factor motifs ( $q$   
992 value  $< 0.1$ ) in the cluster are described with the time courses. According to the  
993 enriched transcription factor motifs, we defined the regulatory connections between the  
994 transcription factors and the genes in the cluster. To avoid overestimation, we excluded  
995 a cluster from the inference if the transcription factor binding motif was more enriched  
996 in the children clusters. The remaining transcription factor motifs, but not the excluded  
997 transcription factor motifs, are described here. The transcription factor motifs enriched  
998 in the upstream clusters are not described in the downstream clusters. **(C)** The  
999 histogram of the  $q$  values for the overlaps between the inferred genes of the  
1000 transcription factors and those predicted from ChIP data. The ChIP data were obtained  
1001 from the ChIP-Atlas database (Oki et al., 2018). The  $q$  values were calculated by the  
1002 one-tailed Fisher's exact test and Benjamini–Hochberg procedure (Yoav Benjamini,  
1003 1995).  
1004

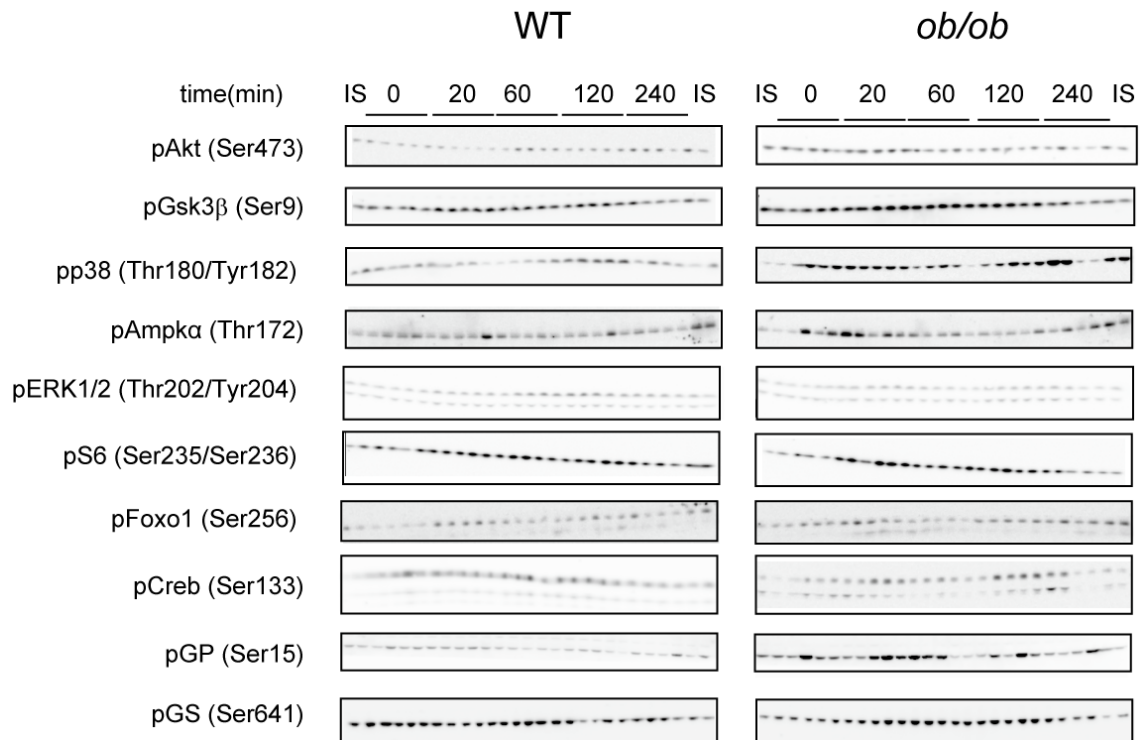

1006 **Fig. S6. Western blotting for insulin signaling molecules.** The phosphorylation of the  
1007 indicated insulin signaling molecules in the skeletal muscle of WT and *ob/ob* mice at  
1008 the indicated time point after oral glucose administration. Residues in parentheses  
1009 indicate the phosphorylation site(s) (human sequence numbering) recognized by the  
1010 antibodies. Western blot data for all mice are shown (n = 5 mice per genotype for  
1011 glucose administration).

1012

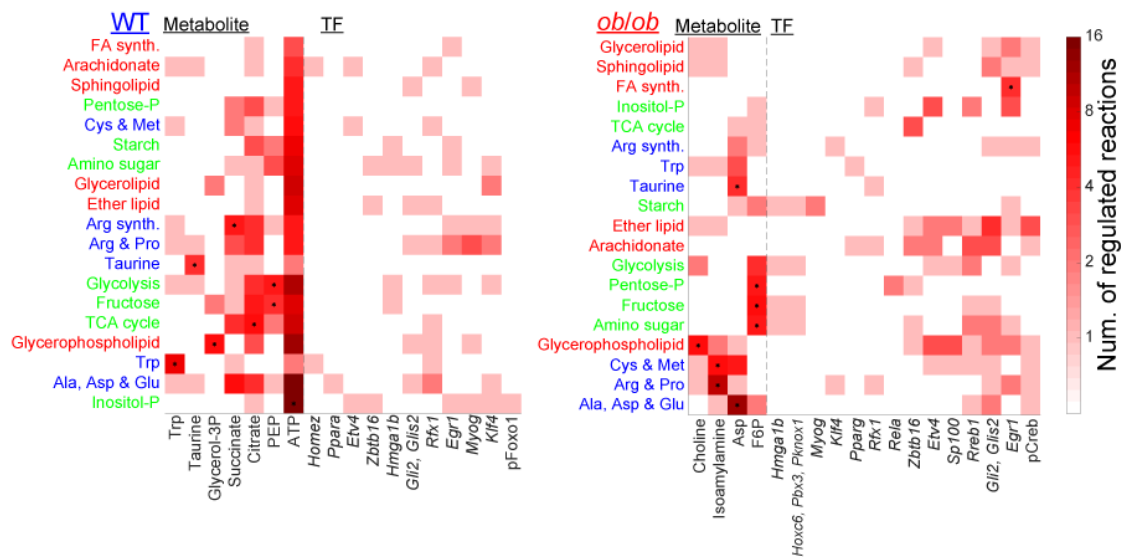

1014 **Fig. S7. Metabolic reactions regulated by glucose-responsive molecules in each**  
 1015 **metabolic pathway node.** Heat maps showing the number of regulated metabolic  
 1016 reactions in each metabolic pathway node (rows) by each glucose-responsive metabolite  
 1017 (left columns) and each transcription factor-dependent glucose-responsive genes of  
 1018 metabolic enzymes (right columns) in WT and *ob/ob* mice. The \* symbols indicate  
 1019 significant associations ( $q$  value  $< 0.01$ ) between metabolic reactions in the metabolic  
 1020 pathway node and those regulated by glucose-responsive molecules (Data File S10).  
 1021 The  $q$  values were calculated by the one-tailed Fisher's exact test and Benjamini–  
 1022 Hochberg procedure (Yoav Benjamini, 1995). Only metabolic pathway nodes with  
 1023 significant associations with any glucose-responsive molecule are shown. Only glucose-  
 1024 responsive metabolites with significant associations with any metabolic pathway node  
 1025 are shown.

1026

1027

1028

1029

- 1030 Data File S1. Metabolomic data.
- 1031 Data File S2. Lipidomic data.
- 1032 Data File S3. Transcriptomic data.
- 1033 Data File S4. Pathway enrichment analysis of glucose-responsive genes.
- 1034 Data File S5. Enrichment analysis of gene clusters.
- 1035 Data File S6. Inferred regulatory connections between transcription factors and genes.
- 1036 Data File S7. Overlap between the inferred genes of transcription factors and those
- 1037 predicted from experimental ChIP data.
- 1038 Data File S8. Western blotting data.
- 1039 Data File S9. Regulatory transomic network for glucose-responsive metabolic reactions.
- 1040 Data File S10. Significant associations between glucose-responsive molecules and
- 1041 metabolic pathways.

1042

1043 **Acknowledgements:**

1044 We thank Maki Ohishi, Ayano Ueno, Hiroko Maki, Keiko Endo, and Sanae Ashitani

1045 (Keio University) for their technical assistance with metabolomic analysis using CE–

1046 MS; and our laboratory members for critically reading this manuscript and for their

1047 technical assistance with the experiments. The computational analysis of this work was

1048 performed in part with support of the super computer system of the National Institute of

1049 Genetics (NIG), Research Organization of Information and Systems (ROIS). **Funding:**  
1050 This work was supported by the Creation of Fundamental Technologies for  
1051 Understanding and Control of Biosystem Dynamics, CREST (JPMJCR12W3) from the  
1052 Japan Science and Technology Agency (JST) and by the Japan Society for the  
1053 Promotion of Science (JSPS) KAKENHI Grant Number JP17H06300, JP17H06299,  
1054 JP18H03979. T.K. receives funding from a Grant-in-Aid for Early-Career Scientists  
1055 (JP21K16349). K.Y. receives funding from JSPS KAKENHI Grant Number  
1056 JP15H05582, JP18H05431, and “Creation of Innovative Technology for Medical  
1057 Applications Based on the Global Analyses and Regulation of Disease- Related  
1058 Metabolites”, PRESTO (JPMJPR1538) from JST. K.M. receives funding from a Grant-  
1059 in-Aid for Early-Career Scientists (JP21K15342). S.O. receives funding from a Grant-  
1060 in-Aid for Young Scientists (B) (JP17K14864, JP21K14467). M.F. receives funding  
1061 from a Grant-in-Aid for Challenging Exploratory Research (JP16K12508). T.T. was  
1062 supported by JSPS KAKENHI Grant Number JP19K24361, JP20K19915. H.O. was  
1063 supported by JSPS KAKENHI Grant Number JP19H03696, JP19K20394. H. I. was  
1064 supported by JSPS KAKENHI Grant Number JP18KT0020, JP17H05499, and by  
1065 Adaptable and Seamless Technology transfer Program through Target-driven R&D (A-  
1066 STEP) from JST. H.K. was supported by JSPS KAKENHI Grant Number JP20H03237.

1067 Y.S. was supported by the JSPS KAKENHI Grant Number JP17H06306. A. Hirayama  
1068 was supported by the JSPS KAKENHI Grant Number JP18H04804. T.S. receives  
1069 funding from the AMED-CREST from the Japan Agency for Medical Research and  
1070 Development (AMED) under Grant Number JP18gm0710003. **Author contributions:**  
1071 T.K., M.E., A. Hatano, K.M., Y.I., R.E., and H.K. designed and performed the animal  
1072 experiments, enzyme assays and western blot analysis. A. Hirayama and T.S. performed  
1073 metabolomic analysis using CE-MS. Y.S. performed RNA sequencing transcriptomic  
1074 analysis. T.K., K.Y., S.O., M.F., K.H., Y.I., S.U., A.T., Y.P., H.M., D.L., Y.B., T.T.,  
1075 and H.O. performed transomic analysis. The writing group consisted of T.K., M.E.,  
1076 H.I., and S.K. The study was conceived and supervised by T.K. and S.K. **Competing**  
1077 **interests:** The authors declare that they have no competing interests. **Data and**  
1078 **materials availability:** Sequencing data measured in this study have been deposited in  
1079 the DNA Data Bank of Japan Sequence Read Archive (DRA) ([www.ddbj.nig.ac.jp/](http://www.ddbj.nig.ac.jp/))  
1080 under the accession no. DRA010972 and DRA013659. All other data needed to  
1081 evaluate the conclusions in the paper are present in the paper or Supplementary  
1082 Materials. The code used for the analysis in this paper is available upon request.  
1083  
1084 **References:**  
1085 Archuleta, T.L., Lemieux, A.M., Saengsirisuwan, V., Teachey, M.K., Lindborg, K.A.,



- 1086 Kim, J.S., and Henriksen, E.J. (2009). Oxidant stress-induced loss of IRS-1 and IRS-2  
1087 proteins in rat skeletal muscle: Role of p38 MAPK. *Free Radic. Biol. Med.* *47*, 1486–  
1088 1493.
- 1089 Arner, E., Daub, C.O., Vitting-Seerup, K., Andersson, R., Lilje, B., Drabløs, F.,  
1090 Lennartsson, A., Rönerblad, M., Hrydziuszko, O., Vitezic, M., et al. (2015).  
1091 Transcribed enhancers lead waves of coordinated transcription in transitioning  
1092 mammalian cells. *Science* *347*, 1010–1014.
- 1093 Barthel, A., Schmoll, D., and Unterman, T.G. (2005). FoxO proteins in insulin action  
1094 and metabolism. *Trends Endocrinol. Metab.* *16*, 183–189.
- 1095 Brooks, G.A. (2020). Lactate as a fulcrum of metabolism. *Redox Biol.* *35*, 101454.
- 1096 Bult, C.J., Eppig, J.T., Kadin, J.A., Richardson, J.E., Blake, J.A., and Mouse Genome  
1097 Database Group (2008). The Mouse Genome Database (MGD): mouse biology and  
1098 model systems. *Nucleic Acids Res.* *36*, D724-8.
- 1099 Chèneby, J., Gheorghe, M., Artufel, M., Mathelier, A., and Ballester, B. (2018). ReMap  
1100 2018: An updated atlas of regulatory regions from an integrative analysis of DNA-  
1101 binding ChIP-seq experiments. *Nucleic Acids Res.* *46*, D267–D275.
- 1102 Cunningham, F., Amode, M.R., Barrell, D., Beal, K., Billis, K., Brent, S., Carvalho-  
1103 Silva, D., Clapham, P., Coates, G., Fitzgerald, S., et al. (2015). Ensembl 2015. *Nucleic*  
1104 *Acids Res.* *43*, D662–D669.
- 1105 DeFronzo, R.A., and Tripathy, D. (2009). Skeletal muscle insulin resistance is the  
1106 primary defect in type 2 diabetes. *Diabetes Care* *32 Suppl 2*.
- 1107 Dimitriadis, G., Mitron, P., Lambadiari, V., Maratou, E., and Raptis, S.A. (2011a).  
1108 Insulin effects in muscle and adipose tissue. *Diabetes Res. Clin. Pract.* *93*, 52–59.
- 1109 Dimitriadis, G., Mitron, P., Lambadiari, V., Maratou, E., and Raptis, S.A. (2011b).

- 1110 Insulin effects in muscle and adipose tissue. *Diabetes Res. Clin. Pract.* *93*, 52–59.
- 1111 Dobin, A., Davis, C.A., Schlesinger, F., Drenkow, J., Zaleski, C., Jha, S., Batut, P.,  
1112 Chaisson, M., and Gingeras, T.R. (2013). STAR: Ultrafast universal RNA-seq aligner.  
1113 *Bioinformatics* *29*, 15–21.
- 1114 Egami, R., Kokaji, T., Hatano, A., Yugi, K., Eto, M., Morita, K., Ohno, S., Fujii, M.,  
1115 Hironaka, K. ichi, Uematsu, S., et al. (2021). Trans-omic analysis reveals obesity-  
1116 associated dysregulation of inter-organ metabolic cycles between the liver and skeletal  
1117 muscle. *IScience* *24*, 102217.
- 1118 Evans, R.M., Barish, G.D., and Wang, Y.X. (2004). PPARs and the complex journey to  
1119 obesity. *Nat. Med.* *10*, 355–361.
- 1120 Flicek, P., Amode, M.R., Barrell, D., Beal, K., Billis, K., Brent, S., Carvalho-Silva, D.,  
1121 Clapham, P., Coates, G., Fitzgerald, S., et al. (2014). Ensembl 2014. *Nucleic Acids Res.*  
1122 *42*, 749–755.
- 1123 Furuyama, T., Kitayama, K., Yamashita, H., and Mori, N. (2003). Forkhead  
1124 transcription factor FOXO1 (FKHR)-dependent induction of PDK4 gene expression in  
1125 skeletal muscle during energy deprivation. *Biochem. J.* *375*, 365–371.
- 1126 Hasin, Y., Seldin, M., and Lusic, A. (2017). Multi-omics approaches to disease.  
1127 *Genome Biol.* *18*, 1–15.
- 1128 Hui, S., Cowan, A.J., Zeng, X., Yang, L., TeSlaa, T., Li, X., Bartman, C., Zhang, Z.,  
1129 Jang, C., Wang, L., et al. (2020). Quantitative Fluxomics of Circulating Metabolites.  
1130 *Cell Metab.* *32*, 676-688.e4.
- 1131 Humphrey, S.J., Yang, G., Yang, P., Fazakerley, D.J., Stöckli, J., Yang, J.Y., and  
1132 James, D.E. (2013). Dynamic adipocyte phosphoproteome reveals that Akt directly  
1133 regulates mTORC2. *Cell Metab.* *17*, 1009–1020.

- 1134 Ishii, N., Nakahigashi, K., Baba, T., Robert, M., Soga, T., Kanai, A., Hirasawa, T.,  
1135 Naba, M., Hirai, K., Hoque, A., et al. (2007). Multiple high-throughput analyses  
1136 monitor the response of *E. coli* to perturbations. *Science* 316, 593–597.
- 1137 Jaiswal, N., Gavin, M.G., Quinn, W.J., Luongo, T.S., Gelfer, R.G., Baur, J.A., and  
1138 Titchenell, P.M. (2019). The role of skeletal muscle Akt in the regulation of muscle  
1139 mass and glucose homeostasis. *Mol. Metab.* 28, 1–13.
- 1140 Junker, B.H., Klukas, C., and Schreiber, F. (2006). Vanted: A system for advanced data  
1141 analysis and visualization in the context of biological networks. *BMC Bioinformatics* 7,  
1142 1–13.
- 1143 Kahn, S.E., Hull, R.L., and Utzschneider, K.M. (2006). Mechanisms linking obesity to  
1144 insulin resistance and type 2 diabetes. *Nature* 444, 840–846.
- 1145 Kanehisa, M., Goto, S., Sato, Y., Furumichi, M., and Tanabe, M. (2012). KEGG for  
1146 integration and interpretation of large-scale molecular data sets. *Nucleic Acids Res.* 40,  
1147 D109-14.
- 1148 Kanehisa, M., Furumichi, M., Tanabe, M., Sato, Y., and Morishima, K. (2017). KEGG:  
1149 New perspectives on genomes, pathways, diseases and drugs. *Nucleic Acids Res.* 45,  
1150 D353–D361.
- 1151 Katz, J., and Tayek, J. a (1998). Gluconeogenesis and the Cori cycle in 12-, 20-, and 40-  
1152 h-fasted humans. *Am. J. Physiol.* 275, E537–E542.
- 1153 Kawata, K., Hatano, A., Yugi, K., Kubota, H., Sano, T., Fujii, M., Tomizawa, Y.,  
1154 Kokaji, T., Tanaka, K.Y., Uda, S., et al. (2018). Trans-omic Analysis Reveals Selective  
1155 Responses to Induced and Basal Insulin across Signaling, Transcriptional, and  
1156 Metabolic Networks. *IScience* 7, 212–229.
- 1157 Kel, A.E., Gößling, E., Reuter, I., Cheremushkin, E., Kel-Margoulis, O. V., and

1158 Wingender, E. (2003). MATCH<sup>TM</sup>: A tool for searching transcription factor binding  
1159 sites in DNA sequences. *Nucleic Acids Res.* *31*, 3576–3579.

1160 Kinsella, R.J., Kähäri, A., Haider, S., Zamora, J., Proctor, G., Spudich, G., Almeida-  
1161 King, J., Staines, D., Derwent, P., Kerhornou, A., et al. (2011). Ensembl BioMarts: A  
1162 hub for data retrieval across taxonomic space. *Database* *2011*, 1–9.

1163 Kokaji, T., Hatano, A., Ito, Y., Yugi, K., Eto, M., Morita, K., Ohno, S., Fujii, M.,  
1164 Hironaka, K., Egami, R., et al. (2020). Transomics analysis reveals allosteric and gene  
1165 regulation axes for altered hepatic glucose-responsive metabolism in obesity. *Sci.*  
1166 *Signal.* *13*.

1167 Koves, T.R., Ussher, J.R., Noland, R.C., Slentz, D., Mosedale, M., Ilkayeva, O., Bain,  
1168 J., Stevens, R., Dyck, J.R.B., Newgard, C.B., et al. (2008). Mitochondrial overload and  
1169 incomplete fatty acid oxidation contribute to skeletal muscle insulin resistance. *Cell*  
1170 *Metab.* *7*, 45–56.

1171 Krycer, J.R., Yugi, K., Hirayama, A., Fazakerley, D.J., Quek, L.E., Scalzo, R., Ohno,  
1172 S., Hodson, M.P., Ikeda, S., Shoji, F., et al. (2017). Dynamic Metabolomics Reveals  
1173 that Insulin Primes the Adipocyte for Glucose Metabolism. *Cell Rep.* *21*, 3536–3547.

1174 Li, B., and Dewey, C.N. (2011). RSEM: accurate transcript quantification from RNA-  
1175 Seq data with or without a reference genome. *BMC Bioinformatics* *12*, 323.

1176 Lopes, M., Brejchova, K., Riecan, M., Novakova, M., Rossmeisl, M., Cajka, T., Lopes,  
1177 M., Brejchova, K., Riecan, M., Novakova, M., et al. (2021). Resource Metabolomics  
1178 atlas of oral <sup>13</sup>C-glucose tolerance test in mice II Metabolomics atlas of oral <sup>13</sup>C-  
1179 glucose tolerance test in mice. *CellReports* *37*, 109833.

1180 Lynch, C.J., and Adams, S.H. (2014). Branched-chain amino acids in metabolic  
1181 signalling and insulin resistance. *Nat. Rev. Endocrinol.* *10*, 723–736.

- 1182 Matsumoto, K., Suzuki, A., Wakaguri, H., Sugano, S., and Suzuki, Y. (2014).  
1183 Construction of mate pair full-length cDNAs libraries and characterization of  
1184 transcriptional start sites and termination sites. *Nucleic Acids Res.* *42*.  
1185 Matys, V., Kel-Margoulis, O. V., Fricke, E., Liebich, I., Land, S., Barre-Dirrie, A.,  
1186 Reuter, I., Chekmenev, D., Krull, M., Hornischer, K., et al. (2006). TRANSFAC(R) and  
1187 its module TRANSCompel(R): transcriptional gene regulation in eukaryotes. *Nucl.*  
1188 *Acids Res.* *34*, D108-110.  
1189 Nakae, J., Kitamura, T., Silver, D.L., and Accili, D. (2001). The forkhead transcription  
1190 factor Foxo1 (Fkhr) confers insulin sensitivity onto glucose-6- phosphatase expression.  
1191 *J. Clin. Invest.*, 1081359–1081367.  
1192 Noguchi, R., Kubota, H., Yugi, K., Toyoshima, Y., Komori, Y., Soga, T., and Kuroda,  
1193 S. (2013). The selective control of glycolysis, gluconeogenesis and glycogenesis by  
1194 temporal insulin patterns. *Mol. Syst. Biol.* *9*, 664.  
1195 Ohno, S., Quek, L.-E., Krycer, J.R., Yugi, K., Hirayama, A., Ikeda, S., Shoji, F.,  
1196 Suzuki, K., Soga, T., James, D.E., et al. (2020). Kinetic trans-omic analysis reveals key  
1197 regulatory mechanisms for insulin-regulated glucose metabolism in adipocytes.  
1198 *IScience* *23*, 101479.  
1199 Oki, S., Ohta, T., Shioi, G., Hatanaka, H., Ogasawara, O., Okuda, Y., Kawaji, H.,  
1200 Nakaki, R., Sese, J., and Meno, C. (2018). ChIP-Atlas: a data-mining suite powered by  
1201 full integration of public ChIP-seq data. *EMBO Rep.* *19*, e46255.  
1202 Piening, B.D., Zhou, W., Contrepois, K., Röst, H., Gu Urban, G.J., Mishra, T., Hanson,  
1203 B.M., Bautista, E.J., Leopold, S., Yeh, C.Y., et al. (2018). Integrative Personal Omics  
1204 Profiles during Periods of Weight Gain and Loss. *Cell Syst.* 1–14.  
1205 Puchalska, P., and Crawford, P.A. (2017). Multi-dimensional Roles of Ketone Bodies in

- 1206 Fuel Metabolism, Signaling, and Therapeutics. *Cell Metab.* *25*, 262–284.
- 1207 Robinson, M.D., McCarthy, D.J., and Smyth, G.K. (2009). edgeR: A Bioconductor  
1208 package for differential expression analysis of digital gene expression data.  
1209 *Bioinformatics* *26*, 139–140.
- 1210 Ruvinsky, I., and Meyuhas, O. (2006). Ribosomal protein S6 phosphorylation: from  
1211 protein synthesis to cell size. *Trends Biochem. Sci.* *31*, 342–348.
- 1212 Saxton, R.A., and Sabatini, D.M. (2017). mTOR Signaling in Growth, Metabolism, and  
1213 Disease. *Cell* *168*, 960–976.
- 1214 Schomburg, I., Chang, A., Placzek, S., Söhngen, C., Rother, M., Lang, M., Munaretto,  
1215 C., Ulas, S., Stelzer, M., Grote, A., et al. (2013). BRENDA in 2013: Integrated  
1216 reactions, kinetic data, enzyme function data, improved disease classification: New  
1217 options and contents in BRENDA. *Nucleic Acids Res.* *41*, 764–772.
- 1218 Soga, T., and Heiger, D.N. (2000). Amino acid analysis by capillary electrophoresis  
1219 electrospray ionization mass spectrometry. *Anal. Chem.* *72*, 1236–1241.
- 1220 Soga, T., Baran, R., Suematsu, M., Ueno, Y., Ikeda, S., Sakurakawa, T., Kakazu, Y.,  
1221 Ishikawa, T., Robert, M., Nishioka, T., et al. (2006). Differential metabolomics reveals  
1222 ophthalmic acid as an oxidative stress biomarker indicating hepatic glutathione  
1223 consumption. *J. Biol. Chem.* *281*, 16768–16776.
- 1224 Soga, T., Igarashi, K., Ito, C., Mizobuchi, K., Zimmermann, H.-P., and Tomita, M.  
1225 (2009). Metabolomic profiling of anionic metabolites by capillary electrophoresis mass  
1226 spectrometry. *Anal. Chem.* *81*, 6165–6174.
- 1227 Soltis, A.R., Kennedy, N.J., Xin, X., Zhou, F., Ficarro, S.B., Yap, Y.S., Matthews, B.J.,  
1228 Lauffenburger, D.A., White, F.M., Marto, J.A., et al. (2017). Hepatic Dysfunction  
1229 Caused by Consumption of a High-Fat Diet. *Cell Rep.* *21*, 3317–3328.

- 1230 Storey, J.D. (2002). A direct approach to false discovery rates. *J. R. Stat. Soc. Ser. B*  
1231 *Stat. Methodol.*
- 1232 Von Wilamowitz-Moellendorff, A., Hunter, R.W., García-Rocha, M., Kang, L., López-  
1233 Soldado, I., Lantier, L., Patel, K., Pegg, M.W., Martínez-Pons, C., Voss, M., et al.  
1234 (2013). Glucose-6-phosphate-mediated activation of liver glycogen synthase plays a key  
1235 role in hepatic glycogen synthesis. *Diabetes* *62*, 4070–4082.
- 1236 Wiley, H.S. (2011). Integrating multiple types of data for signaling research: Challenges  
1237 and opportunities. *Sci. Signal.* *4*, 1–4.
- 1238 Wong, K.E., Mikus, C.R., Slentz, D.H., Seiler, S.E., Debalsi, K.L., Ilkayeva, O.R.,  
1239 Crain, K.I., Kinter, M.T., Kien, C.L., Stevens, R.D., et al. (2015). Muscle-specific  
1240 overexpression of PGC-1 $\alpha$  does not augment metabolic improvements in response to  
1241 exercise and caloric restriction. *Diabetes* *64*, 1532–1543.
- 1242 Yevshin, I., Sharipov, R., Kolmykov, S., Kondrakhin, Y., and Kolpakov, F. (2019).  
1243 GTRD: A database on gene transcription regulation - 2019 update. *Nucleic Acids Res.*  
1244 *47*, D100–D105.
- 1245 Yoav Benjamini, Y.H. (1995). Controlling the False Discovery Rate : A Practical and  
1246 Powerful Approach to Multiple Testing. *J. R. Stastical Soc.* *57*, 289–300.
- 1247 Yugi, K., and Kuroda, S. (2018). Metabolism as a signal generator across trans-omic  
1248 networks at distinct time scales. *Curr. Opin. Syst. Biol.* *8*, 59–66.
- 1249 Yugi, K., Kubota, H., Toyoshima, Y., Noguchi, R., Kawata, K., Komori, Y., Uda, S.,  
1250 Kunida, K., Tomizawa, Y., Funato, Y., et al. (2014). Reconstruction of Insulin Signal  
1251 Flow from Phosphoproteome and Metabolome Data. *Cell Rep.* *8*, 1171–1183.
- 1252 Yugi, K., Kubota, H., Hatano, A., and Kuroda, S. (2016). Trans-Omics: How To  
1253 Reconstruct Biochemical Networks Across Multiple ‘Omic’ Layers. *Trends Biotechnol.*

1254 *xx*, 1–15.

1255

1256

1257

1258
